# Supplementary material for: How do extreme ENSO events affect Antarctic surface mass balance?
Source: Copernicus journal article supplement (doi:10.5194/egusphere-2024-3425), 2024-11-13
Supplement: Supplementary file 1 [file egusphere-2024-3425-supplement.pdf]

1 **Supplementary Materials to**  
2 **How do extreme ENSO events affect Antarctic surface mass**  
3 **balance?**

4 *The Cryosphere*

5 Macha, J.M.A.<sup>1\*</sup>; Mackintosh, A.N.<sup>1</sup>; McCormack, F.S.<sup>1</sup>; Henley, B.J.<sup>2,3</sup>; McGregor, H.V.<sup>3,4</sup>;  
6 van Dalum, C.T.<sup>5</sup>; Purich, A.<sup>1</sup>

7 <sup>1</sup> Securing Antarctica's Environmental Future, School of Earth, Atmosphere and  
8 Environment, Monash University, Clayton, Kulin Nations VIC 3800, Australia;

9 <sup>2</sup>School of Agriculture, Food & Ecosystem Sciences, University of Melbourne, Burnley,  
10 VIC 3121, Australia

11 <sup>3</sup> Securing Antarctica's Environmental Future, University of Wollongong, Northfields  
12 Ave Wollongong, NSW 2522, Australia

13 <sup>4</sup>Environmental Futures, School of Earth, atmosphere and Life Sciences, University of  
14 Wollongong, Wollongong, NSW 2522, Australia

15 <sup>5</sup>Utrecht University, Institute for Marine and Atmospheric Research Utrecht,  
16 Princetonplein 5, 3584 CC Utrecht, The Netherlands

17 \*corresponding author, Jessica Macha ([Jessica.macha@monash.edu](mailto:Jessica.macha@monash.edu))

18

19 **Contents of this file**

20 Text S1 to S2

21 Figures S1 to S12

22 Tables S1 to S4

23

24 **Introduction**

25 This supporting information provides supplementary figures, tables and text to the main  
26 manuscript of *How do extreme ENSO events affect Antarctic surface mass balance?*

27

|    |                                                                                                 |                  |
|----|-------------------------------------------------------------------------------------------------|------------------|
| 28 | <b>Table of Contents</b>                                                                        |                  |
| 29 |                                                                                                 |                  |
| 30 | 1.1: Classifying Central Pacific & Eastern Pacific El Niño indices.....                         | Text S1          |
| 31 | 2.1: Calculating Outliers.....                                                                  | Text S2          |
| 32 | 3.1: Violin plots of regional surface mass balance anomalies .....                              | Figure S1 – S3   |
| 33 | 3.2: Scatter plots of regional surface mass balance anomalies .....                             | Figure S4 – S5   |
| 34 | 4.1: Regional SMB histograms during extreme El Niño events.....                                 | Figure S6 – S9   |
| 35 | 4.2: Statistical significance testing of regional SMB anomalies distributions during extreme El |                  |
| 36 | Niño events.....                                                                                | Table S1 – S2    |
| 37 | 5.1: Regional SMB histograms during extreme El Niño events.....                                 | Figure S10 – S12 |
| 38 | 5.2: Statistical significance testing of regional SMB anomalies distributions during extreme El |                  |
| 39 | Niño events.....                                                                                | Table S3 – S4    |
| 40 |                                                                                                 |                  |

41 **Section 1.1: Classifying Central Pacific and Eastern Pacific El Niño indices**

42 **Text S1.**

43 Central Pacific (CP) El Niño events and Eastern Pacific (EP) El Niño events are classified in  
44 the same way as Macha et al. (2024) according to the Ren and Jin (2011)  $N_{CP}$  and  $N_{EP}$   
45 indices respectively:

46

47  $N_{EP} = N_3 - \alpha N_4$  (S1)

48  $N_{CP} = N_4 - \alpha N_3$  (S2)

49 Where:

50 
$$\alpha = \begin{cases} \frac{2}{5} N_3 N_4 > 0, \\ 0, otherwise \end{cases}$$

51

52 Here,  $N_3$  is the Niño-3 index, which is the SST anomaly averaged over the regions 5°N--5°S  
53 and 150°-90°W, and  $N_4$  is the Niño-4 index, which is the SST anomaly averaged over the  
54 regions 5°N--5°S and 160°E--150°W (Ren and Jin, 2011). Niño-3 and Niño-4 indices are  
55 sourced from NOAA (Rayner et al. 2003), based on the HadISST dataset. We use 3-month  
56 seasonal averages from 1979--2018 CP and EP El Niño indices (Equations 1; 2).

57

58 **Section 2.1: Calculating Outliers**

59 **Text S2.**

60 We identify outliers in each regional cumulative SON SMB anomaly dataset using Equations  
61 S1-S3 (Mudelsee, 2010) for Figure 5.

62  $IQR = Q3 - Q1$  (S3)

63  $Upper\ Outlier\ Bound = Q3 + 1.5\ IQR$  (S4)

64  $Lower\ Outlier\ Bound = Q1 - 1.5\ IQR$  (S5)

65 where:

66  $Q1 = lower\ quartile\ (25th\ percentile)$

67  $Q3 = upper\ quartile\ (75th\ percentile)$

68

69 **Section 3.1: Violin plots of SMB**

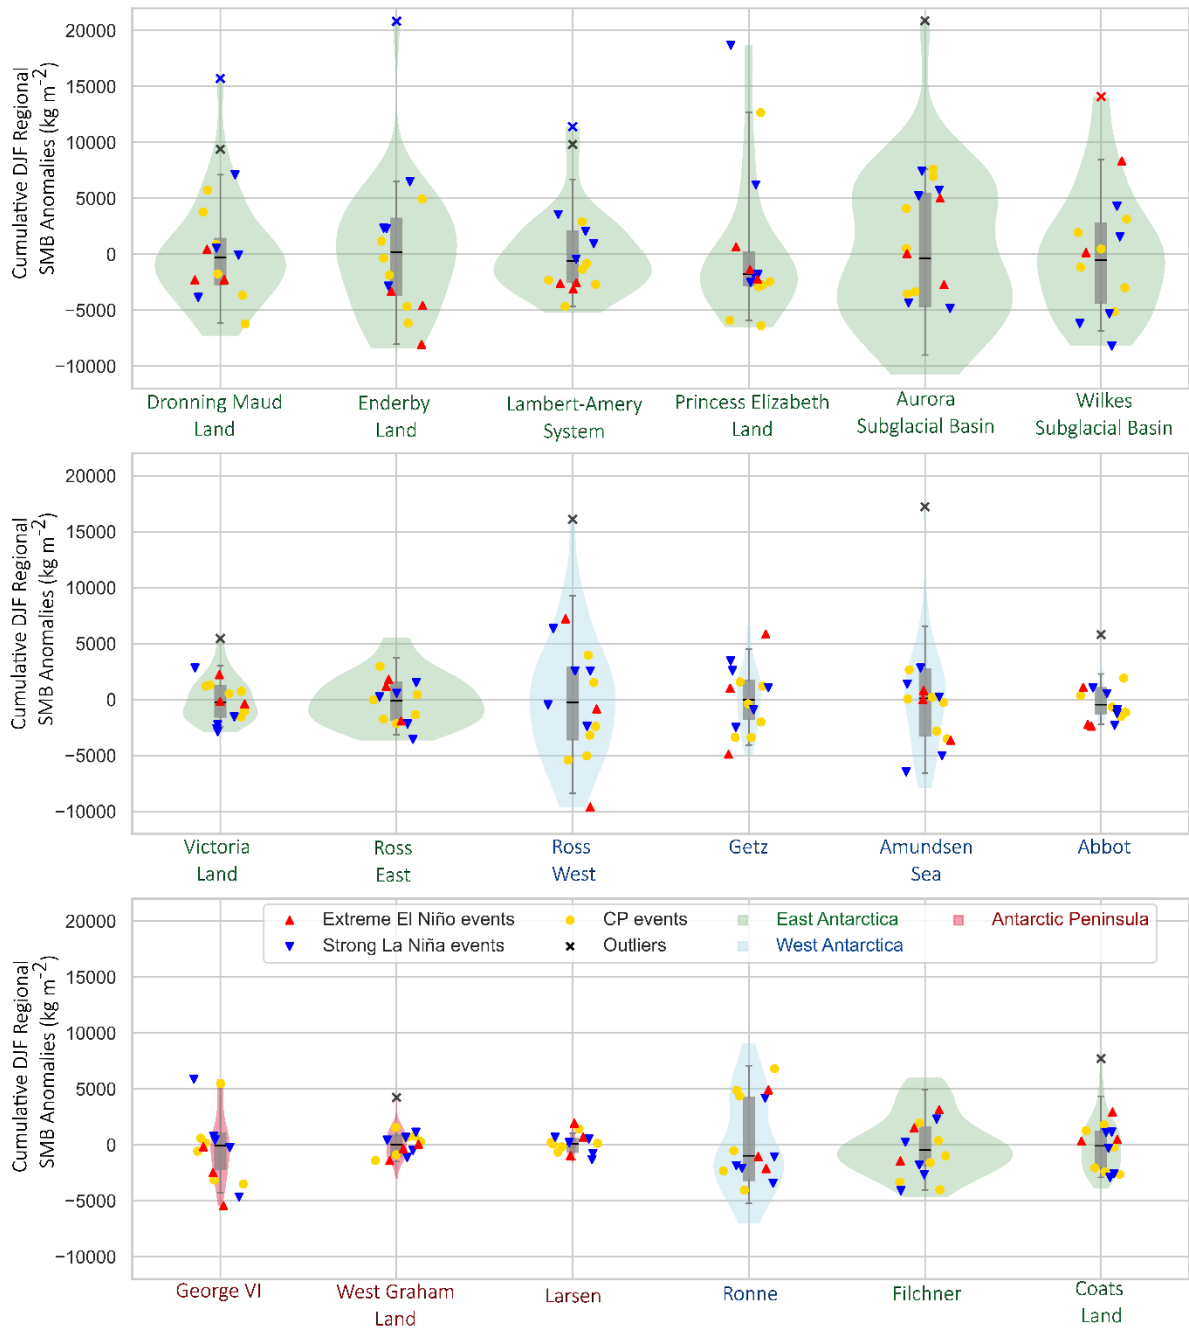

70

71 **Supplementary Figure S1. Relationship between extreme ENSO events and regional**  
 72 **Antarctic surface mass balance anomalies during DJF.** Density curves of regional  
 73 cumulative DJF SMB anomalies for each Antarctic Ice Sheet regional catchment (a-j), scaled  
 74 by the regional catchment size. Box plots show the interquartile range (IQR), with medians  
 75 (black line) and whiskers (5th and 95th percentiles). East Antarctic (light green), West  
 76 Antarctic (light blue) and Antarctic Peninsula (pink) catchments, outliers (crosses; see  
 77 supplement), extreme El Niño events (red), strong La Niña events (blue) and Central Pacific  
 78 El Niño events (yellow) are highlighted.

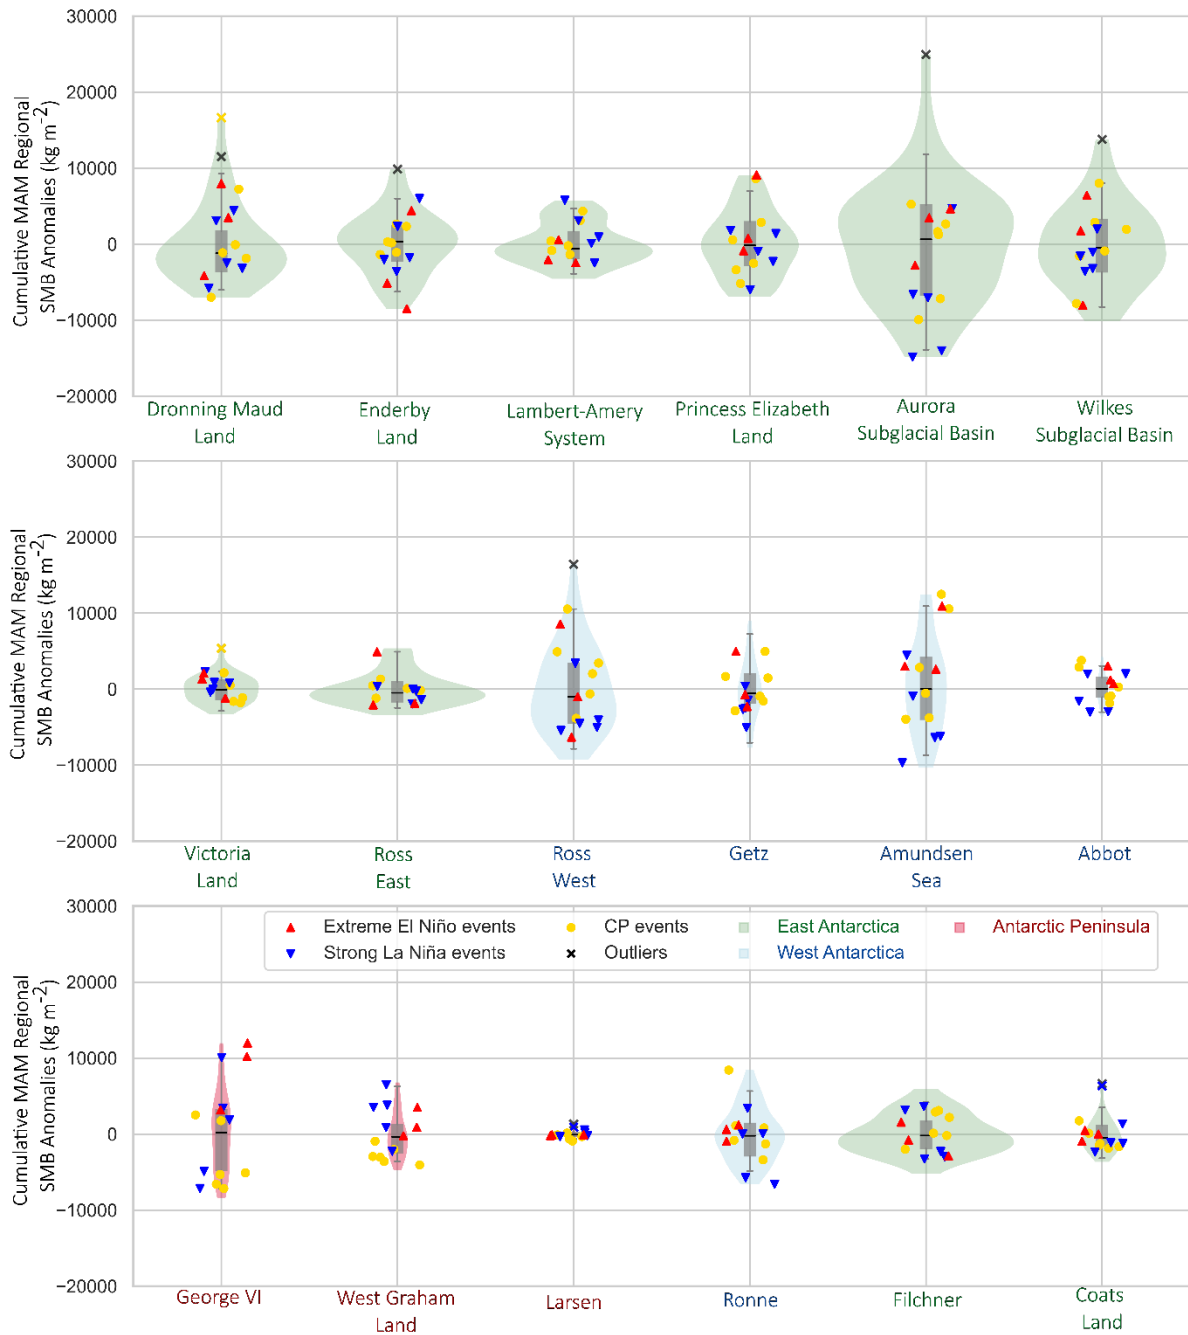

79

80 **Supplementary Figure S2. Relationship between extreme ENSO events and regional**  
 81 **Antarctic surface mass balance anomalies during MAM.** Density curves of regional  
 82 cumulative MAM SMB anomalies for each Antarctic Ice Sheet regional catchment (a-j),  
 83 scaled by the regional catchment size. Box plots show the interquartile range (IQR), with  
 84 medians (black line) and whiskers (5th and 95th percentiles). East Antarctic (light green),  
 85 West Antarctic (light blue) and Antarctic Peninsula (pink) catchments, outliers (crosses; see  
 86 supplement), extreme El Niño events (red), strong La Niña events (blue) and Central Pacific  
 87 El Niño events (yellow) are highlighted.

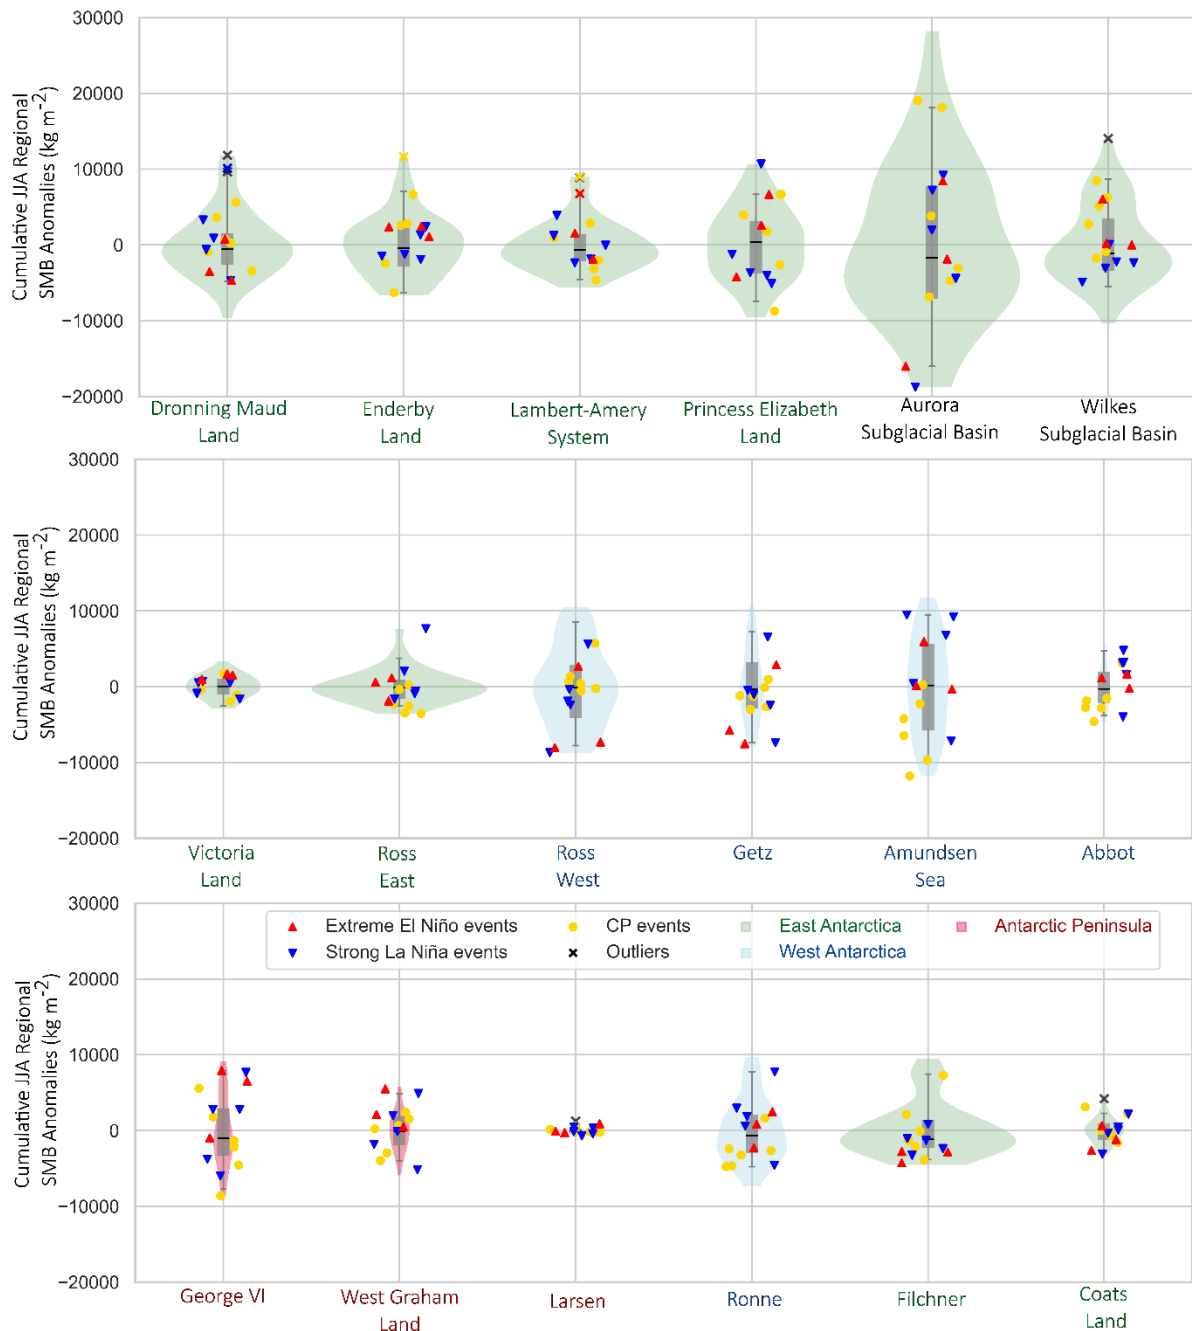

88

89 **Supplementary Figure S3. Relationship between extreme ENSO events and regional**  
 90 **Antarctic surface mass balance anomalies during JJA.** Density curves of regional  
 91 cumulative JJA SMB anomalies for each Antarctic Ice Sheet regional catchment (a-j), scaled  
 92 by the regional catchment size. Box plots show the interquartile range (IQR), with medians  
 93 (black line) and whiskers (5th and 95th percentiles). East Antarctic (light green), West  
 94 Antarctic (light blue) and Antarctic Peninsula (pink) catchments, outliers (crosses; see  
 95 supplement), extreme El Niño events (red), strong La Niña events (blue) and Central Pacific  
 96 El Niño events (yellow) are highlighted.

97

98 **Section 3.2: Scatter plots of SMB**

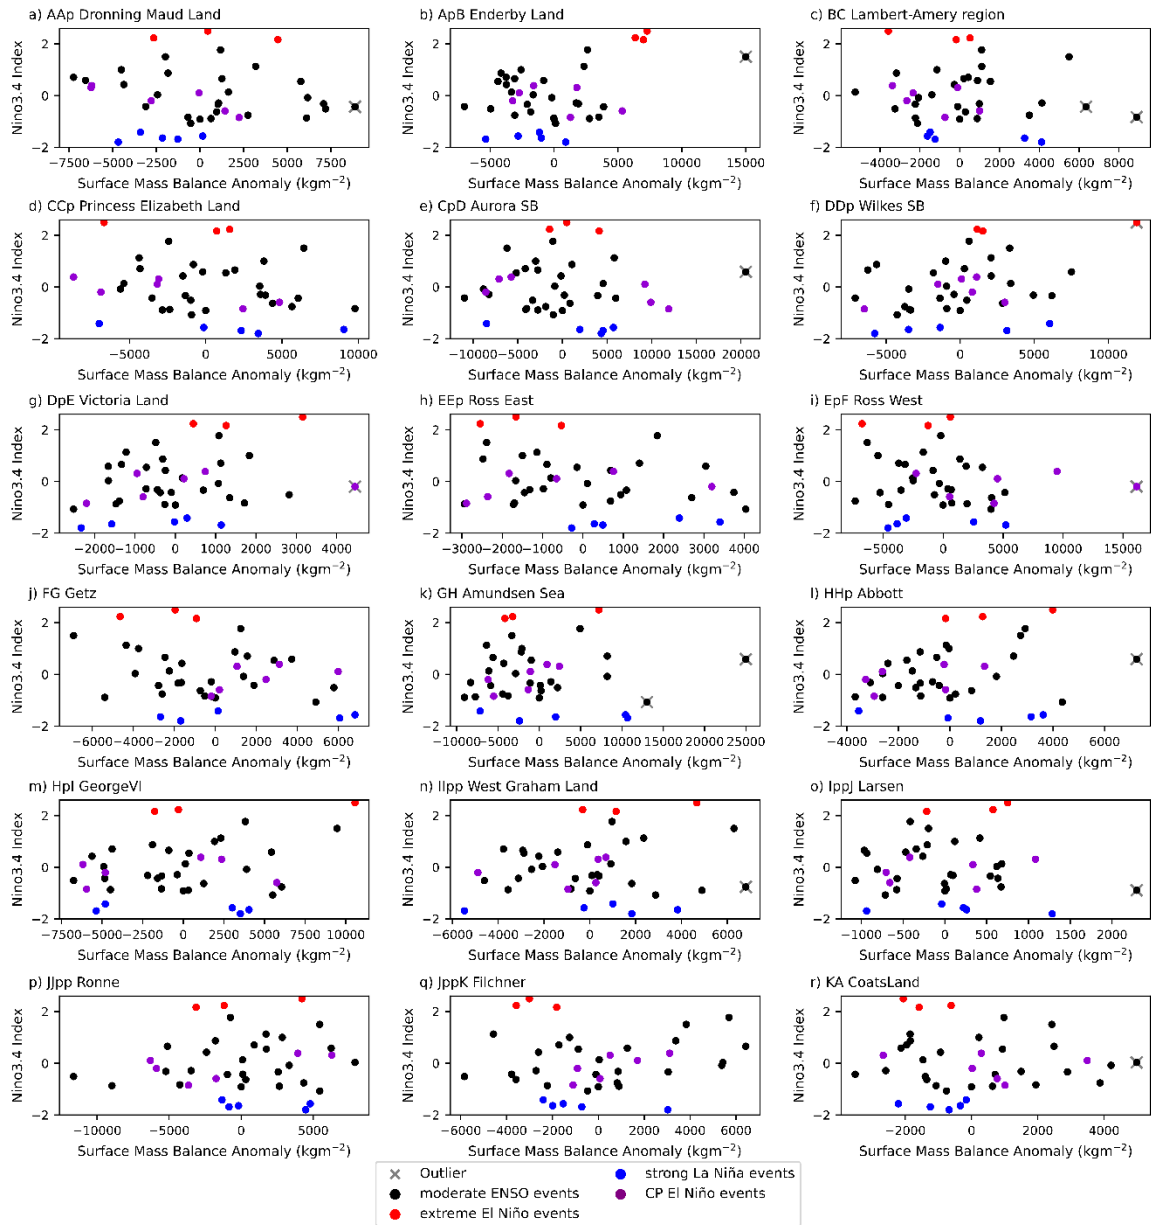

99

100 **Supplementary Figure S4.** Scatter plots of regional cumulative SON surface mass balance  
 101 anomaly from 1979-2018 against the Niño3.4 Index across all Antarctic Ice Sheet regional  
 102 basins (a-r). No trendlines are included as no trendline is statistically significant at the 5%  
 103 confidence level using a two-tailed Students' *t* test. Outliers (grey cross), moderate ENSO  
 104 events (black), extreme El Niño events (red), strong La Niña events (blue) and Central  
 105 Pacific El Niño events (purple).



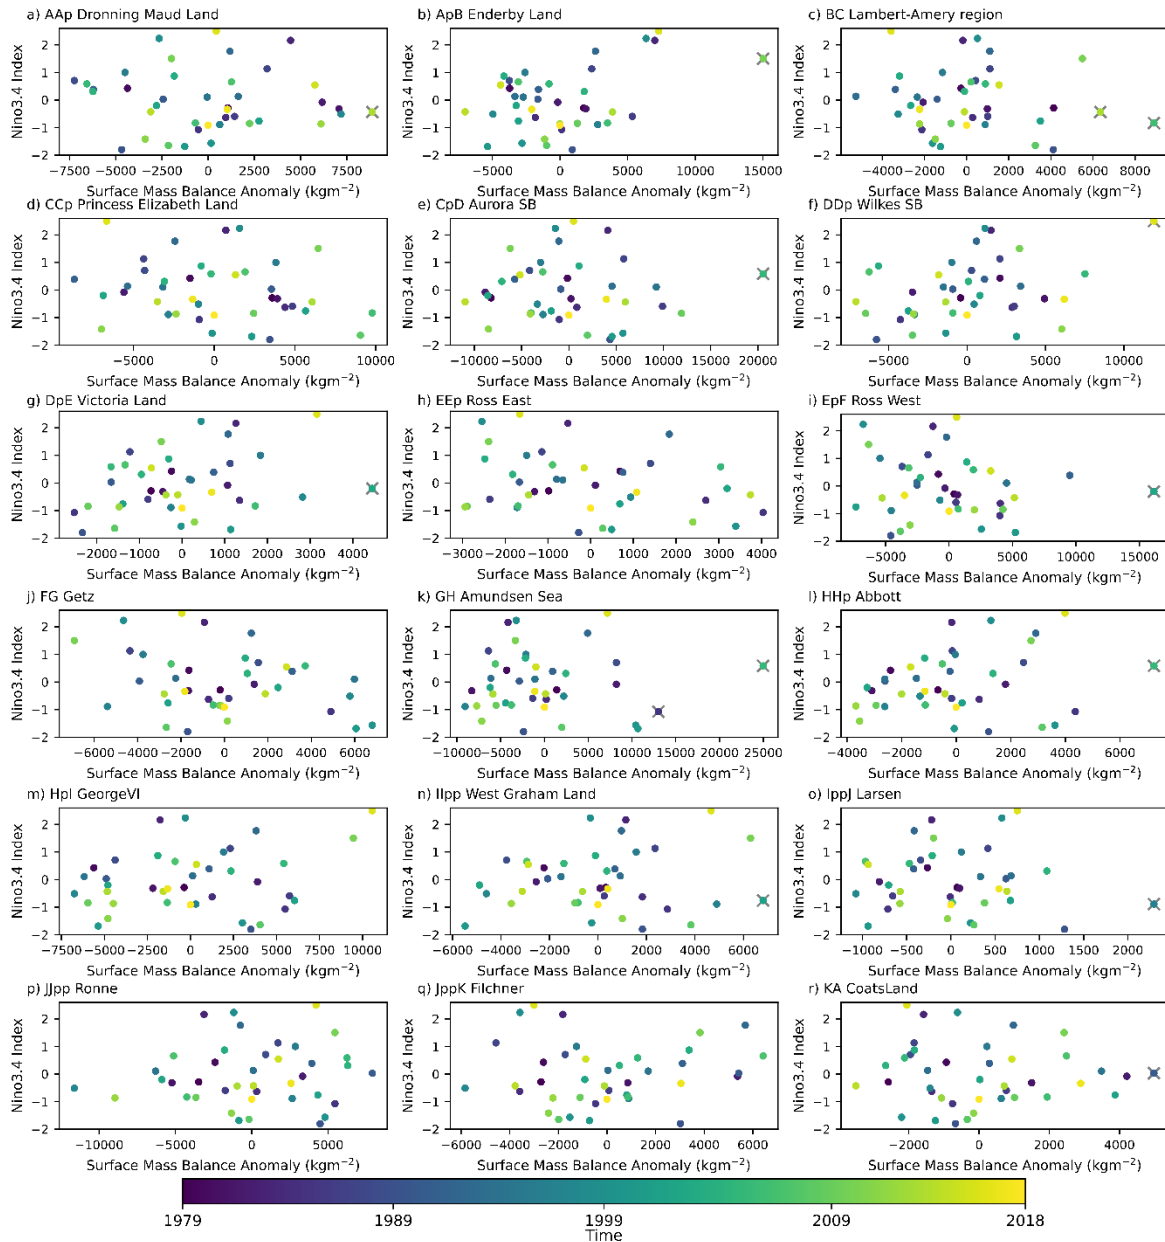

106

107 **Supplementary Figure S5.** Scatter plots of regional cumulative SON surface mass balance  
 108 anomaly from 1979-2018 against the Niño3.4 Index across Antarctic Ice Sheet regional  
 109 basins (a-r), coloured according to year (colour bar).

110

111 **Section 4.1: Regional SMB histograms during extreme El Niño events**

112

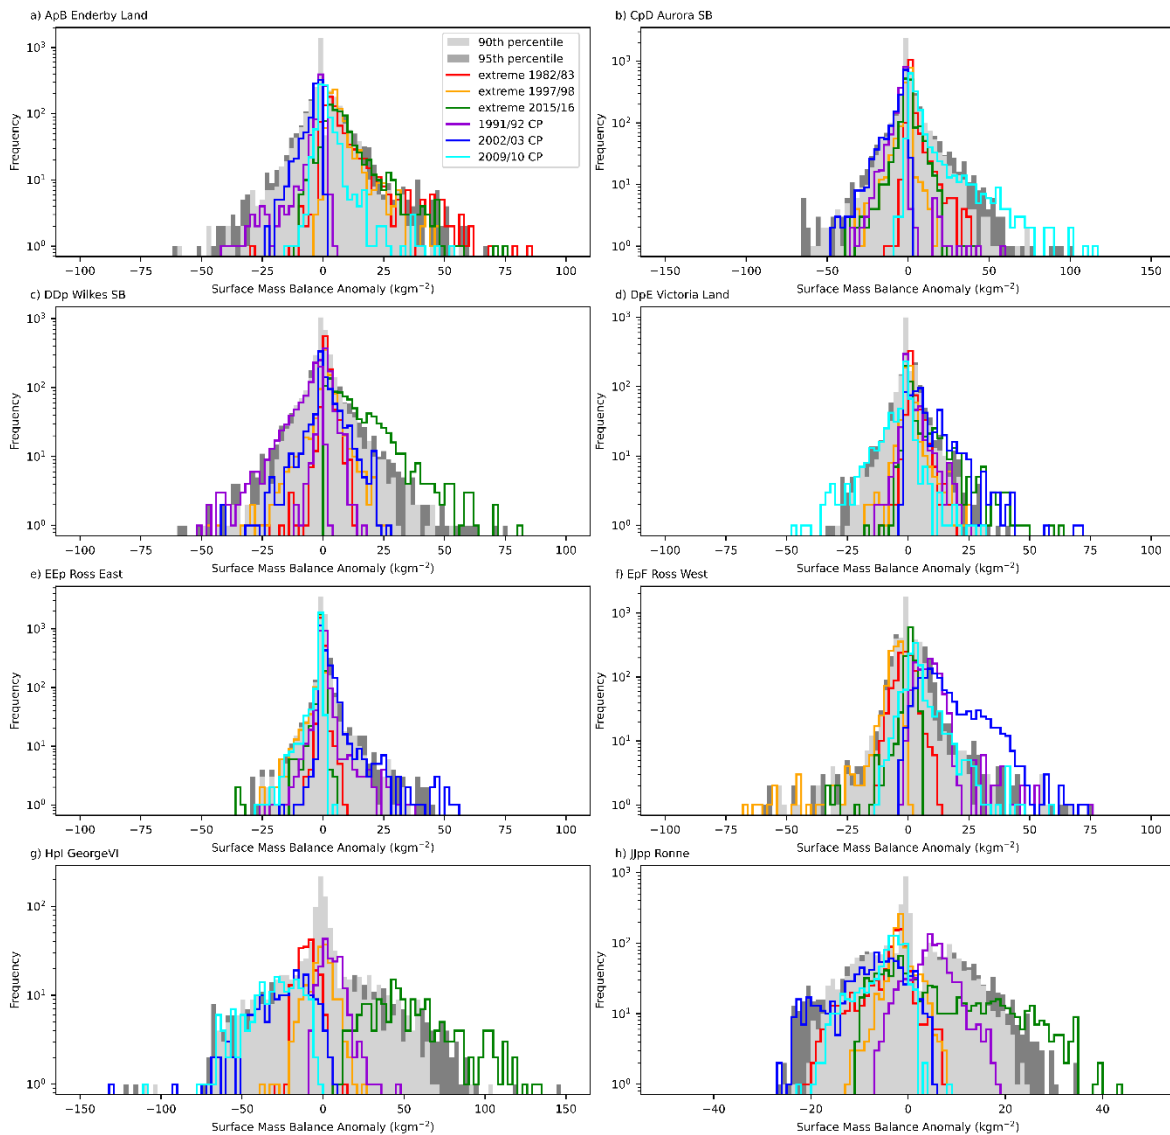

113

114 **Supplementary Figure S6. Probability distributions of regional Antarctic surface mass**  
 115 **balance anomalies during extreme El Niño events and CP El Niño events.** Regional  
 116 SMB probability distributions of SMB anomalies in SON for extreme El Niño events: 1982/83  
 117 (red), 1997/98 (orange) and 2015/16 (green); and CP El Niño events: 1991/92 (purple),  
 118 2002/03 (blue) and 2009/10 (cyan). Regional 90th (light grey shading) and 95th percentile  
 119 (dark grey shading) SMB anomalies for SON for 1979-2018 period.

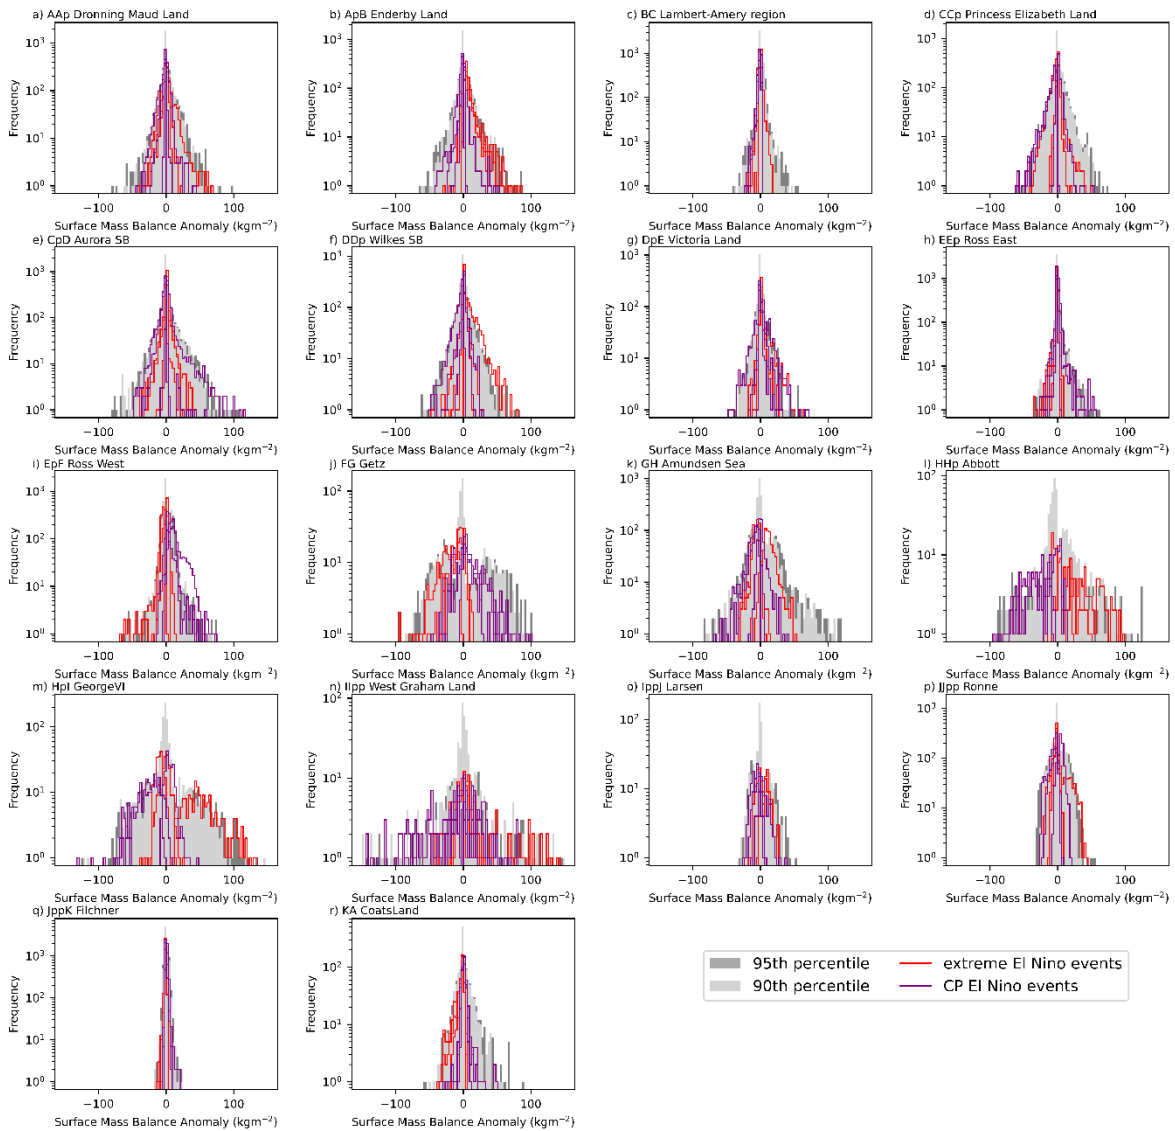

122 **Supplementary Figure S7. Probability distributions of regional Antarctic surface mass**  
 123 **balance anomalies during extreme El Niño events and CP El Niño events in**  
 124 **SON.** Regional SMB probability distributions of SMB changes in SON for extreme El Niño  
 125 events (red lines) and CP events (purple lines), and regional 90th (light grey shading) and  
 126 95th percentile (dark grey shading) SMB anomalies for SON for 1979-2018 period.

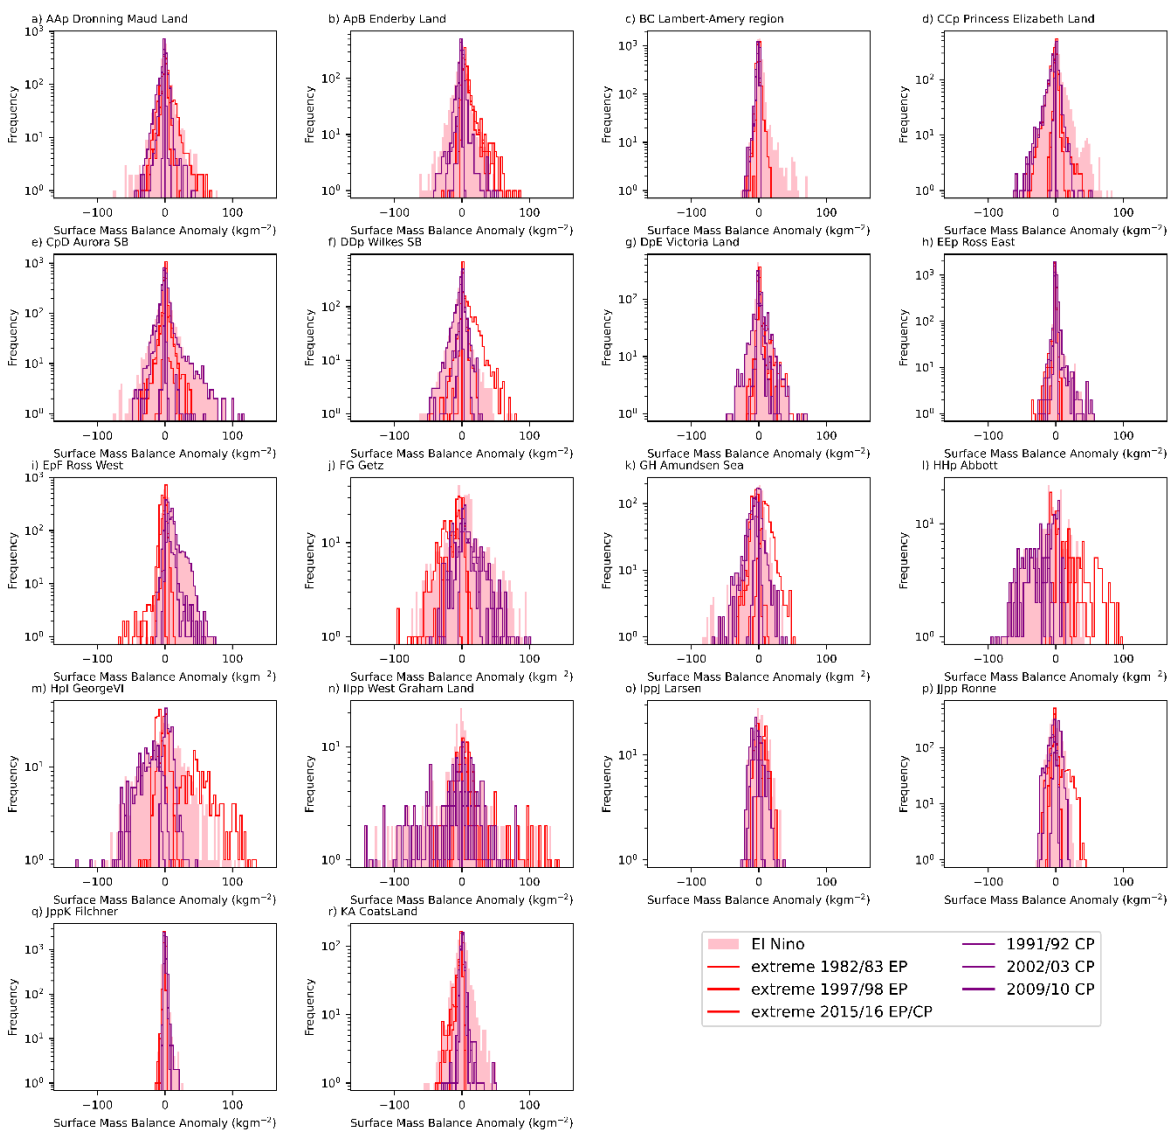

128 **Supplementary Figure S8.** Regional SMB probability distributions of SMB changes in SON  
 129 for El Niño events excluding extreme events (pink shading), during extreme El Niño events  
 130 (red lines) and CP events (purple lines)

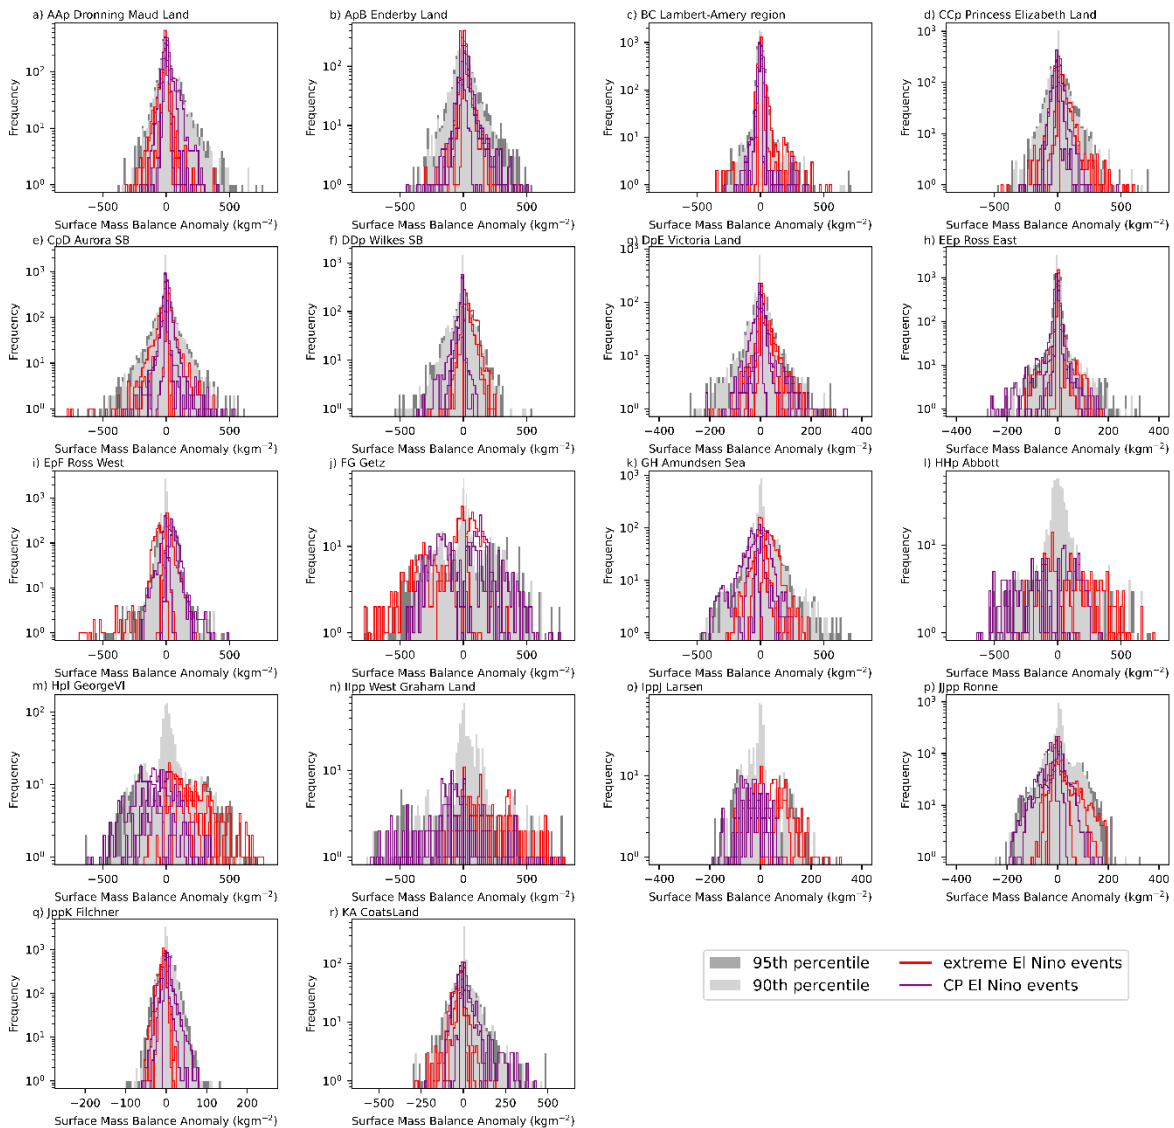

132

133 **Supplementary Figure S9.** Regional SMB probability distributions of cumulative annual  
 134 SMB anomalies (relative to 1979-2018 average) for extreme El Niño events (red lines) and  
 135 CP events (purple lines), and regional 90th (light grey shading) and 95th percentile (dark  
 136 grey shading) SMB anomalies for 1979-2018 period.

137

138 **Section 4.2: Statistical significance testing of regional SMB anomalies distributions**  
 139 **during extreme El Niño events.**

|      | Kolmogorov-Smirnov (K-S) test |                |           |                |           |                |           |                |           |                |           |                |
|------|-------------------------------|----------------|-----------|----------------|-----------|----------------|-----------|----------------|-----------|----------------|-----------|----------------|
|      | 1982/83                       |                | 1997/98   |                | 2015/16   |                | 1991/92   |                | 2002/03   |                | 2009/10   |                |
|      | statistic                     | <i>p-value</i> | statistic | <i>p-value</i> | statistic | <i>p-value</i> | statistic | <i>p-value</i> | statistic | <i>p-value</i> | statistic | <i>p-value</i> |
| AAp  | 0.330                         | <0.001         | 0.187     | <0.001         | 0.152     | <0.001         | 0.546     | <0.001         | 0.467     | <0.001         | 0.308     | <0.001         |
| ApB  | 0.539                         | <0.001         | 0.680     | <0.001         | 0.562     | <0.001         | 0.250     | <0.001         | 0.511     | <0.001         | 0.261     | <0.001         |
| BC   | 0.263                         | <0.001         | 0.110     | <0.001         | 0.396     | <0.001         | 0.370     | <0.001         | 0.330     | <0.001         | 0.175     | <0.001         |
| CCp  | 0.331                         | <0.001         | 0.354     | <0.001         | 0.579     | <0.001         | 0.615     | <0.001         | 0.534     | <0.001         | 0.422     | <0.001         |
| CpD  | 0.481                         | <0.001         | 0.162     | <0.001         | 0.087     | <0.001         | 0.569     | <0.001         | 0.574     | <0.001         | 0.521     | <0.001         |
| DDp  | 0.452                         | <0.001         | 0.281     | <0.001         | 0.628     | <0.001         | 0.336     | <0.001         | 0.186     | <0.001         | 0.540     | <0.001         |
| DpE  | 0.492                         | <0.001         | 0.184     | <0.001         | 0.258     | <0.001         | 0.141     | <0.001         | 0.531     | <0.001         | 0.251     | <0.001         |
| EEp  | 0.201                         | <0.001         | 0.465     | <0.001         | 0.371     | <0.001         | 0.155     | <0.001         | 0.201     | <0.001         | 0.488     | <0.001         |
| EpF  | 0.104                         | <0.001         | 0.651     | <0.001         | 0.367     | <0.001         | 0.680     | <0.001         | 0.744     | <0.001         | 0.447     | <0.001         |
| FG   | 0.266                         | <0.001         | 0.563     | <0.001         | 0.326     | <0.001         | 0.468     | <0.001         | 0.326     | <0.001         | 0.085     | 0.144          |
| GH   | 0.393                         | <0.001         | 0.347     | <0.001         | 0.638     | <0.001         | 0.326     | <0.001         | 0.509     | <0.001         | 0.376     | <0.001         |
| HHp  | 0.303                         | <0.001         | 0.490     | <0.001         | 0.753     | 0.241          | 0.264     | <0.001         | 0.609     | <0.001         | 0.543     | <0.001         |
| Hpl  | 0.422                         | <0.001         | 0.231     | <0.001         | 0.751     | <0.001         | 0.390     | <0.001         | 0.485     | <0.001         | 0.611     | <0.001         |
| IIpp | 0.221                         | 0.002          | 0.172     | 0.005          | 0.356     | <0.001         | 0.164     | 0.014          | 0.402     | <0.001         | 0.184     | 0.002          |
| IppJ | 0.239                         | <0.001         | 0.408     | <0.001         | 0.512     | <0.001         | 0.342     | <0.001         | 0.408     | <0.001         | 0.316     | <0.001         |
| JJpp | 0.361                         | <0.001         | 0.259     | <0.001         | 0.220     | <0.001         | 0.450     | <0.001         | 0.403     | <0.001         | 0.402     | <0.001         |
| JppK | 0.209                         | <0.001         | 0.469     | <0.001         | 0.450     | <0.001         | 0.395     | <0.001         | 0.203     | <0.001         | 0.329     | <0.001         |
| K    | 0.369                         | <0.001         | 0.312     | <0.001         | 0.288     | <0.001         | 0.292     | <0.001         | 0.163     | 0.208          | 0.378     | <0.001         |

140  
 141 **Supplementary Table S1.** Kolmogorov-Smirnov test statistics and *p-value* results showing  
 142 statistically significant difference in SMB SON distributions for extreme El Niño events  
 143 (1982/83, 1997/98, 2015/16) and CP El Niño events (1991/92, 2002/03, 2009/10) for each  
 144 Antarctic region compared to the SMB SON distribution for the region for the full 1979-2018  
 145 time period with Monte-Carlo Sampling and 1000 simulations. Results in **bold** are  
 146 statistically significant at the 5% significance level.

|     |         | Kolmogorov-Smirnov (K-S) test |                  |                |                  |                |                  |                |                  |                |                  |
|-----|---------|-------------------------------|------------------|----------------|------------------|----------------|------------------|----------------|------------------|----------------|------------------|
|     |         | 1997/98                       |                  | 2015/16        |                  | 1991/92        |                  | 2002/03        |                  | 2009/10        |                  |
|     |         | statistic                     | p-value          | statistic      | p-value          | statistic      | p-value          | statistic      | p-value          | statistic      | p-value          |
| AAp | 1982/83 | <b>0.4212</b>                 | <b>&lt;0.001</b> | <b>0.25597</b> | <b>&lt;0.001</b> | <b>0.75072</b> | <b>&lt;0.001</b> | <b>0.68577</b> | <b>&lt;0.001</b> | <b>0.20248</b> | <b>&lt;0.001</b> |
|     | 1997/98 | 0.000                         | 1.000            | <b>0.33047</b> | <b>&lt;0.001</b> | <b>0.38109</b> | <b>&lt;0.001</b> | <b>0.3171</b>  | <b>&lt;0.001</b> | <b>0.47851</b> | <b>&lt;0.001</b> |
|     | 2015/16 |                               |                  | 0.000          | 1.000            | <b>0.69628</b> | <b>&lt;0.001</b> | <b>0.61032</b> | <b>&lt;0.001</b> | <b>0.16523</b> | <b>&lt;0.001</b> |
|     | 1991/92 |                               |                  |                |                  | 0.000          | 1.000            | <b>0.30946</b> | <b>&lt;0.001</b> | <b>0.85005</b> | <b>&lt;0.001</b> |
|     | 2002/03 |                               |                  |                |                  |                |                  | 0.000          | 1.000            | <b>0.76504</b> | <b>&lt;0.001</b> |
| ApB | 1982/83 | <b>0.20629</b>                | <b>&lt;0.001</b> | <b>0.14219</b> | <b>&lt;0.001</b> | <b>0.75758</b> | <b>&lt;0.001</b> | <b>0.89977</b> | <b>&lt;0.001</b> | <b>0.50583</b> | <b>&lt;0.001</b> |
|     | 1997/98 | 0.000                         | 1.000            | <b>0.12238</b> | <b>&lt;0.001</b> | <b>0.92424</b> | <b>&lt;0.001</b> | <b>0.98718</b> | <b>&lt;0.001</b> | <b>0.669</b>   | <b>&lt;0.001</b> |
|     | 2015/16 |                               |                  | 0.000          | 1.000            | <b>0.80769</b> | <b>&lt;0.001</b> | <b>0.89277</b> | <b>&lt;0.001</b> | <b>0.55245</b> | <b>&lt;0.001</b> |
|     | 1991/92 |                               |                  |                |                  | 0.000          | 1.000            | <b>0.59557</b> | <b>&lt;0.001</b> | <b>0.26923</b> | <b>&lt;0.001</b> |
|     | 2002/03 |                               |                  |                |                  |                |                  | 0.000          | 1.000            | <b>0.77156</b> | <b>&lt;0.001</b> |
| BC  | 1982/83 | <b>0.33525</b>                | <b>&lt;0.001</b> | <b>0.60046</b> | <b>&lt;0.001</b> | <b>0.6194</b>  | <b>&lt;0.001</b> | <b>0.58611</b> | <b>&lt;0.001</b> | <b>0.17394</b> | <b>&lt;0.001</b> |
|     | 1997/98 | 0.000                         | 1.000            | <b>0.45867</b> | <b>&lt;0.001</b> | <b>0.38576</b> | <b>&lt;0.001</b> | <b>0.2744</b>  | <b>&lt;0.001</b> | <b>0.26693</b> | <b>&lt;0.001</b> |
|     | 2015/16 |                               |                  | 0.000          | 1.000            | <b>0.09357</b> | <b>&lt;0.001</b> | <b>0.27669</b> | <b>&lt;0.001</b> | <b>0.54363</b> | <b>&lt;0.001</b> |
|     | 1991/92 |                               |                  |                |                  | 0.000          | 1.000            | <b>0.19805</b> | <b>&lt;0.001</b> | <b>0.52928</b> | <b>&lt;0.001</b> |
|     | 2002/03 |                               |                  |                |                  |                |                  | 0.000          | 1.000            | <b>0.50459</b> | <b>&lt;0.001</b> |
| CCp | 1982/83 | <b>0.16945</b>                | <b>&lt;0.001</b> | <b>0.89075</b> | <b>&lt;0.001</b> | <b>0.90301</b> | <b>&lt;0.001</b> | <b>0.85842</b> | <b>&lt;0.001</b> | <b>0.23523</b> | <b>&lt;0.001</b> |
|     | 1997/98 | 0.000                         | 1.000            | <b>0.9175</b>  | <b>0.016</b>     | <b>0.92642</b> | <b>&lt;0.001</b> | 0.88852        | 0.106            | <b>0.3311</b>  | <b>&lt;0.001</b> |
|     | 2015/16 |                               |                  | 0.000          | 1.000            | <b>0.10814</b> | <b>&lt;0.001</b> | <b>0.05128</b> | <b>&lt;0.001</b> | <b>0.92419</b> | <b>&lt;0.001</b> |
|     | 1991/92 |                               |                  |                |                  | 0.000          | 1.000            | <b>0.12152</b> | <b>&lt;0.001</b> | <b>0.93088</b> | <b>&lt;0.001</b> |
|     | 2002/03 |                               |                  |                |                  |                |                  | 0.000          | 1.000            | <b>0.90635</b> | <b>&lt;0.001</b> |
| CpD | 1982/83 | <b>0.43324</b>                | <b>&lt;0.001</b> | <b>0.46996</b> | <b>&lt;0.001</b> | <b>0.94726</b> | <b>&lt;0.001</b> | <b>0.92857</b> | <b>&lt;0.001</b> | <b>0.31976</b> | <b>&lt;0.001</b> |
|     | 1997/98 | 0.000                         | 1.000            | <b>0.18158</b> | <b>&lt;0.001</b> | <b>0.68892</b> | <b>&lt;0.001</b> | <b>0.68892</b> | <b>&lt;0.001</b> | <b>0.5988</b>  | <b>&lt;0.001</b> |
|     | 2015/16 |                               |                  | 0.000          | 1.000            | <b>0.64486</b> | <b>&lt;0.001</b> | <b>0.65421</b> | <b>&lt;0.001</b> | <b>0.50868</b> | <b>&lt;0.001</b> |
|     | 1991/92 |                               |                  |                |                  | 0.000          | 1.000            | <b>0.11081</b> | <b>&lt;0.001</b> | <b>0.97597</b> | <b>&lt;0.001</b> |
|     | 2002/03 |                               |                  |                |                  |                |                  | 0.000          | 1.000            | <b>0.96061</b> | <b>&lt;0.001</b> |
| DDp | 1982/83 | <b>0.20348</b>                | <b>&lt;0.001</b> | <b>0.64635</b> | <b>&lt;0.001</b> | <b>0.31665</b> | <b>&lt;0.001</b> | <b>0.44831</b> | <b>&lt;0.001</b> | <b>0.90098</b> | <b>&lt;0.001</b> |
|     | 1997/98 | 0.000                         | 1.000            | <b>0.54516</b> | <b>&lt;0.001</b> | <b>0.16104</b> | <b>&lt;0.001</b> | <b>0.28509</b> | <b>&lt;0.001</b> | <b>0.76061</b> | <b>&lt;0.001</b> |
|     | 2015/16 |                               |                  | 0.000          | 1.000            | <b>0.66268</b> | <b>&lt;0.001</b> | <b>0.57345</b> | <b>&lt;0.001</b> | <b>0.98803</b> | <b>&lt;0.001</b> |
|     | 1991/92 |                               |                  |                |                  | 0.000          | 1.000            | <b>0.24157</b> | <b>0.023</b>     | <b>0.86289</b> | <b>&lt;0.001</b> |
|     | 2002/03 |                               |                  |                |                  |                |                  | 0.000          | 1.000            | <b>0.72035</b> | <b>&lt;0.001</b> |
| DpE | 1982/83 | <b>0.37961</b>                | <b>&lt;0.001</b> | <b>0.32337</b> | <b>&lt;0.001</b> | <b>0.52197</b> | <b>&lt;0.001</b> | <b>0.4007</b>  | <b>&lt;0.001</b> | <b>0.72408</b> | <b>&lt;0.001</b> |
|     | 1997/98 | 0.000                         | 1.000            | <b>0.2478</b>  | <b>&lt;0.001</b> | <b>0.2355</b>  | <b>&lt;0.001</b> | <b>0.52373</b> | <b>&lt;0.001</b> | <b>0.41476</b> | <b>&lt;0.001</b> |
|     | 2015/16 |                               |                  | 0.000          | 1.000            | <b>0.27768</b> | <b>&lt;0.001</b> | <b>0.32865</b> | <b>&lt;0.001</b> | <b>0.46924</b> | <b>&lt;0.001</b> |
|     | 1991/92 |                               |                  |                |                  | 0.000          | 1.000            | <b>0.48155</b> | <b>&lt;0.001</b> | <b>0.33743</b> | <b>&lt;0.001</b> |
|     | 2002/03 |                               |                  |                |                  |                |                  | 0.000          | 1.000            | <b>0.69596</b> | <b>0.047</b>     |
| EEp | 1982/83 | <b>0.34936</b>                | <b>&lt;0.001</b> | <b>0.22254</b> | <b>&lt;0.001</b> | <b>0.28571</b> | <b>&lt;0.001</b> | <b>0.27676</b> | <b>&lt;0.001</b> | <b>0.4743</b>  | <b>&lt;0.001</b> |
|     | 1997/98 | 0.000                         | 1.000            | <b>0.25365</b> | <b>&lt;0.001</b> | <b>0.48986</b> | <b>&lt;0.001</b> | <b>0.43517</b> | <b>&lt;0.001</b> | <b>0.21641</b> | <b>&lt;0.001</b> |
|     | 2015/16 |                               |                  | 0.000          | 1.000            | <b>0.43517</b> | <b>&lt;0.001</b> | <b>0.36822</b> | <b>&lt;0.001</b> | <b>0.34559</b> | <b>&lt;0.001</b> |
|     | 1991/92 |                               |                  |                |                  | 0.000          | 1.000            | <b>0.17067</b> | <b>&lt;0.001</b> | <b>0.54125</b> | <b>&lt;0.001</b> |
|     | 2002/03 |                               |                  |                |                  |                |                  | 0.000          | 1.000            | <b>0.46157</b> | <b>&lt;0.001</b> |
| EpF | 1982/83 | <b>0.62098</b>                | <b>&lt;0.001</b> | <b>0.44986</b> | <b>&lt;0.001</b> | <b>0.77921</b> | <b>&lt;0.001</b> | <b>0.84085</b> | <b>&lt;0.001</b> | <b>0.53818</b> | <b>&lt;0.001</b> |
|     | 1997/98 | 0.000                         | 1.000            | <b>0.93008</b> | <b>&lt;0.001</b> | <b>0.99264</b> | <b>&lt;0.001</b> | <b>0.98896</b> | <b>&lt;0.001</b> | <b>0.89052</b> | <b>&lt;0.001</b> |
|     | 2015/16 |                               |                  | 0.000          | 1.000            | 0.77921        | 0.107            | <b>0.86569</b> | <b>&lt;0.001</b> | <b>0.45538</b> | <b>&lt;0.001</b> |
|     | 1991/92 |                               |                  |                |                  | 0.000          | 1.000            | <b>0.29255</b> | <b>&lt;0.001</b> | <b>0.49402</b> | <b>&lt;0.001</b> |
|     | 2002/03 |                               |                  |                |                  |                |                  | 0.000          | 1.000            | <b>0.62466</b> | <b>&lt;0.001</b> |

147

148 **Supplementary Table S2.** (continued on next page) Kolmogorov-Smirnov test statistics and  
149 *p-value* results showing statistically significant difference between SMB SON distributions  
150 between each extreme El Niño event (1982/83, 1997/98, 2015/16) and each CP El Niño  
151 event (1991/92, 2002/03, 2009/10) for each Antarctic region, with Monte-Carlo Sampling and  
152 1000 simulations. Results in **bold** are statistically significant at the 5% significance level.

|      |         | Kolmogorov-Smirnov (K-S) test |                  |                |                  |                |                  |                |                  |                |                  |
|------|---------|-------------------------------|------------------|----------------|------------------|----------------|------------------|----------------|------------------|----------------|------------------|
|      |         | 1997/98                       |                  | 2015/16        |                  | 1991/92        |                  | 2002/03        |                  | 2009/10        |                  |
|      |         | statistic                     | p-value          | statistic      | p-value          | statistic      | p-value          | statistic      | p-value          | statistic      | p-value          |
| FG   | 1982/83 | <b>0.625</b>                  | <b>&lt;0.001</b> | <b>0.21591</b> | <b>&lt;0.001</b> | 0.65909        | <b>&lt;0.001</b> | <b>0.54545</b> | <b>&lt;0.001</b> | <b>0.26136</b> | <b>&lt;0.001</b> |
|      | 1997/98 | 0.000                         | 1.000            | <b>0.44318</b> | <b>&lt;0.001</b> | 0.98864        | <b>&lt;0.001</b> | <b>0.8125</b>  | <b>&lt;0.001</b> | <b>0.56818</b> | <b>&lt;0.001</b> |
|      | 2015/16 |                               |                  | 0.000          | 1.000            | 0.73864        | <b>&lt;0.001</b> | <b>0.61932</b> | <b>&lt;0.001</b> | <b>0.35227</b> | <b>&lt;0.001</b> |
|      | 1991/92 |                               |                  |                |                  | 0.000          | 1.000            | <b>0.1875</b>  | <b>&lt;0.001</b> | <b>0.4375</b>  | <b>&lt;0.001</b> |
|      | 2002/03 |                               |                  |                |                  |                |                  | 0.000          | 1.000            | <b>0.30114</b> | <b>&lt;0.001</b> |
| GH   | 1982/83 | <b>0.22442</b>                | <b>&lt;0.001</b> | <b>0.90305</b> | <b>&lt;0.001</b> | <b>0.68402</b> | <b>&lt;0.001</b> | <b>0.2316</b>  | <b>&lt;0.001</b> | <b>0.1526</b>  | <b>&lt;0.001</b> |
|      | 1997/98 | 0.000                         | 1.000            | <b>0.92819</b> | <b>&lt;0.001</b> | <b>0.59246</b> | <b>&lt;0.001</b> | <b>0.37702</b> | <b>&lt;0.001</b> | <b>0.19569</b> | <b>&lt;0.001</b> |
|      | 2015/16 |                               |                  | 0.000          | 1.000            | <b>0.7289</b>  | <b>&lt;0.001</b> | <b>0.96409</b> | <b>&lt;0.001</b> | <b>0.92998</b> | <b>&lt;0.001</b> |
|      | 1991/92 |                               |                  |                |                  | 0.000          | 1.000            | <b>0.81329</b> | <b>&lt;0.001</b> | <b>0.63375</b> | <b>&lt;0.001</b> |
|      | 2002/03 |                               |                  |                |                  |                |                  | 0.000          | 1.000            | <b>0.21903</b> | <b>&lt;0.001</b> |
| Hhp  | 1982/83 | <b>0.59524</b>                | <b>&lt;0.001</b> | 0.95238        | 0.064            | <b>0.14286</b> | <b>&lt;0.001</b> | 0.89286        | <b>&lt;0.001</b> | <b>0.79762</b> | <b>&lt;0.001</b> |
|      | 1997/98 | 0.000                         | 1.000            | <b>0.63095</b> | <b>&lt;0.001</b> | <b>0.52381</b> | <b>&lt;0.001</b> | 0.9881         | <b>&lt;0.001</b> | <b>0.97619</b> | <b>&lt;0.001</b> |
|      | 2015/16 |                               |                  | 0.000          | 1.000            | <b>0.878</b>   | 0.281            | 0.810          | <b>&lt;0.001</b> | 0.91526        | 0.084            |
|      | 1991/92 |                               |                  |                |                  | 0.000          | 1.000            | 0.83333        | 0.362            | <b>0.71429</b> | <b>&lt;0.001</b> |
|      | 2002/03 |                               |                  |                |                  |                |                  | 0.000          | 1.000            | 0.15476        | 0.072            |
| Hpl  | 1982/83 | <b>0.52941</b>                | <b>&lt;0.001</b> | <b>0.9893</b>  | <b>&lt;0.001</b> | <b>0.78075</b> | <b>&lt;0.001</b> | <b>0.51872</b> | <b>&lt;0.001</b> | <b>0.68984</b> | <b>&lt;0.001</b> |
|      | 1997/98 | 0.000                         | 1.000            | <b>0.96257</b> | <b>&lt;0.001</b> | <b>0.37968</b> | <b>&lt;0.001</b> | <b>0.65241</b> | <b>&lt;0.001</b> | <b>0.80214</b> | <b>&lt;0.001</b> |
|      | 2015/16 |                               |                  | 0.000          | 1.000            | <b>0.89305</b> | <b>&lt;0.001</b> | 0.784          | 0.069            | 0.617          | 0.181            |
|      | 1991/92 |                               |                  |                |                  | 0.000          | 1.000            | <b>0.86096</b> | <b>&lt;0.001</b> | <b>0.97326</b> | <b>&lt;0.001</b> |
|      | 2002/03 |                               |                  |                |                  |                |                  | 0.000          | 1.000            | <b>0.20321</b> | <b>&lt;0.001</b> |
| lpp  | 1982/83 | <b>0.21875</b>                | <b>&lt;0.001</b> | <b>0.34375</b> | <b>&lt;0.001</b> | <b>0.16667</b> | <b>&lt;0.001</b> | <b>0.59375</b> | <b>&lt;0.001</b> | <b>0.38542</b> | <b>&lt;0.001</b> |
|      | 1997/98 | 0.000                         | 1.000            | <b>0.48958</b> | <b>&lt;0.001</b> | <b>0.21875</b> | <b>&lt;0.001</b> | <b>0.45833</b> | <b>&lt;0.001</b> | <b>0.26042</b> | <b>&lt;0.001</b> |
|      | 2015/16 |                               |                  | 0.000          | 1.000            | <b>0.38542</b> | <b>&lt;0.001</b> | <b>0.64583</b> | <b>&lt;0.001</b> | <b>0.41667</b> | <b>&lt;0.001</b> |
|      | 1991/92 |                               |                  |                |                  | 0.000          | 1.000            | <b>0.55208</b> | <b>&lt;0.001</b> | <b>0.33333</b> | <b>&lt;0.001</b> |
|      | 2002/03 |                               |                  |                |                  |                |                  | 0.000          | 1.000            | <b>0.35417</b> | <b>&lt;0.001</b> |
| lppJ | 1982/83 | <b>0.5679</b>                 | <b>&lt;0.001</b> | 0.71605        | 0.011            | <b>0.22222</b> | <b>&lt;0.001</b> | <b>0.48148</b> | <b>&lt;0.001</b> | <b>0.4321</b>  | <b>&lt;0.001</b> |
|      | 1997/98 | 0.000                         | 1.000            | <b>0.22222</b> | <b>&lt;0.001</b> | 0.7037         | 0.252            | <b>0.80247</b> | <b>&lt;0.001</b> | <b>0.20988</b> | <b>&lt;0.001</b> |
|      | 2015/16 |                               |                  | 0.000          | 1.000            | <b>0.83951</b> | <b>&lt;0.001</b> | <b>0.83951</b> | <b>&lt;0.001</b> | <b>0.39506</b> | <b>&lt;0.001</b> |
|      | 1991/92 |                               |                  |                |                  | 0.000          | 1.000            | <b>0.34568</b> | <b>&lt;0.001</b> | <b>0.60494</b> | <b>&lt;0.001</b> |
|      | 2002/03 |                               |                  |                |                  |                |                  | 0.000          | 1.000            | <b>0.7037</b>  | <b>&lt;0.001</b> |
| Jpp  | 1982/83 | 0.2503                        | <b>&lt;0.001</b> | <b>0.44164</b> | <b>&lt;0.001</b> | <b>0.77617</b> | <b>&lt;0.001</b> | <b>0.35981</b> | <b>&lt;0.001</b> | <b>0.14801</b> | <b>&lt;0.001</b> |
|      | 1997/98 | 0.000                         | 1.000            | <b>0.38628</b> | <b>&lt;0.001</b> | <b>0.68592</b> | <b>&lt;0.001</b> | <b>0.55836</b> | <b>&lt;0.001</b> | <b>0.38267</b> | <b>&lt;0.001</b> |
|      | 2015/16 |                               |                  | 0.000          | 1.000            | <b>0.35018</b> | <b>&lt;0.001</b> | <b>0.44525</b> | <b>&lt;0.001</b> | <b>0.47774</b> | <b>&lt;0.001</b> |
|      | 1991/92 |                               |                  |                |                  | 0.000          | 1.000            | <b>0.75572</b> | <b>&lt;0.001</b> | <b>0.80987</b> | <b>&lt;0.001</b> |
|      | 2002/03 |                               |                  |                |                  |                |                  | 0.000          | 1.000            | <b>0.29723</b> | <b>&lt;0.001</b> |
| JppK | 1982/83 | <b>0.47135</b>                | <b>&lt;0.001</b> | <b>0.4627</b>  | <b>&lt;0.001</b> | <b>0.41477</b> | <b>&lt;0.001</b> | <b>0.2</b>     | <b>&lt;0.001</b> | <b>0.32937</b> | <b>&lt;0.001</b> |
|      | 1997/98 | 0.000                         | 1.000            | <b>0.1236</b>  | <b>&lt;0.001</b> | <b>0.84108</b> | <b>&lt;0.001</b> | <b>0.36685</b> | <b>&lt;0.001</b> | <b>0.52865</b> | <b>&lt;0.001</b> |
|      | 2015/16 |                               |                  | 0.000          | 1.000            | <b>0.83748</b> | <b>&lt;0.001</b> | <b>0.29441</b> | <b>&lt;0.001</b> | <b>0.47568</b> | <b>&lt;0.001</b> |
|      | 1991/92 |                               |                  |                |                  | 0.000          | 1.000            | <b>0.58919</b> | <b>&lt;0.001</b> | <b>0.72288</b> | <b>&lt;0.001</b> |
|      | 2002/03 |                               |                  |                |                  |                |                  | 0.000          | 1.000            | <b>0.18883</b> | <b>&lt;0.001</b> |
| K    | 1982/83 | <b>0.35613</b>                | <b>&lt;0.001</b> | <b>0.1396</b>  | <b>&lt;0.001</b> | <b>0.65527</b> | <b>&lt;0.001</b> | <b>0.50427</b> | <b>&lt;0.001</b> | <b>0.70085</b> | <b>&lt;0.001</b> |
|      | 1997/98 | 0.000                         | 1.000            | <b>0.32479</b> | <b>&lt;0.001</b> | 0.34473        | 0.106            | <b>0.39886</b> | <b>&lt;0.001</b> | <b>0.48718</b> | <b>&lt;0.001</b> |
|      | 2015/16 |                               |                  | 0.000          | 1.000            | <b>0.54416</b> | <b>&lt;0.001</b> | <b>0.4188</b>  | <b>&lt;0.001</b> | <b>0.63533</b> | <b>&lt;0.001</b> |
|      | 1991/92 |                               |                  |                |                  | 0.000          | 1.000            | <b>0.1567</b>  | <b>&lt;0.001</b> | <b>0.19658</b> | <b>&lt;0.001</b> |
|      | 2002/03 |                               |                  |                |                  |                |                  | 0.000          | 1.000            | <b>0.22792</b> | <b>&lt;0.001</b> |

153

154



155 **Section 5.1: Regional SMB histograms during strong La Niña events**

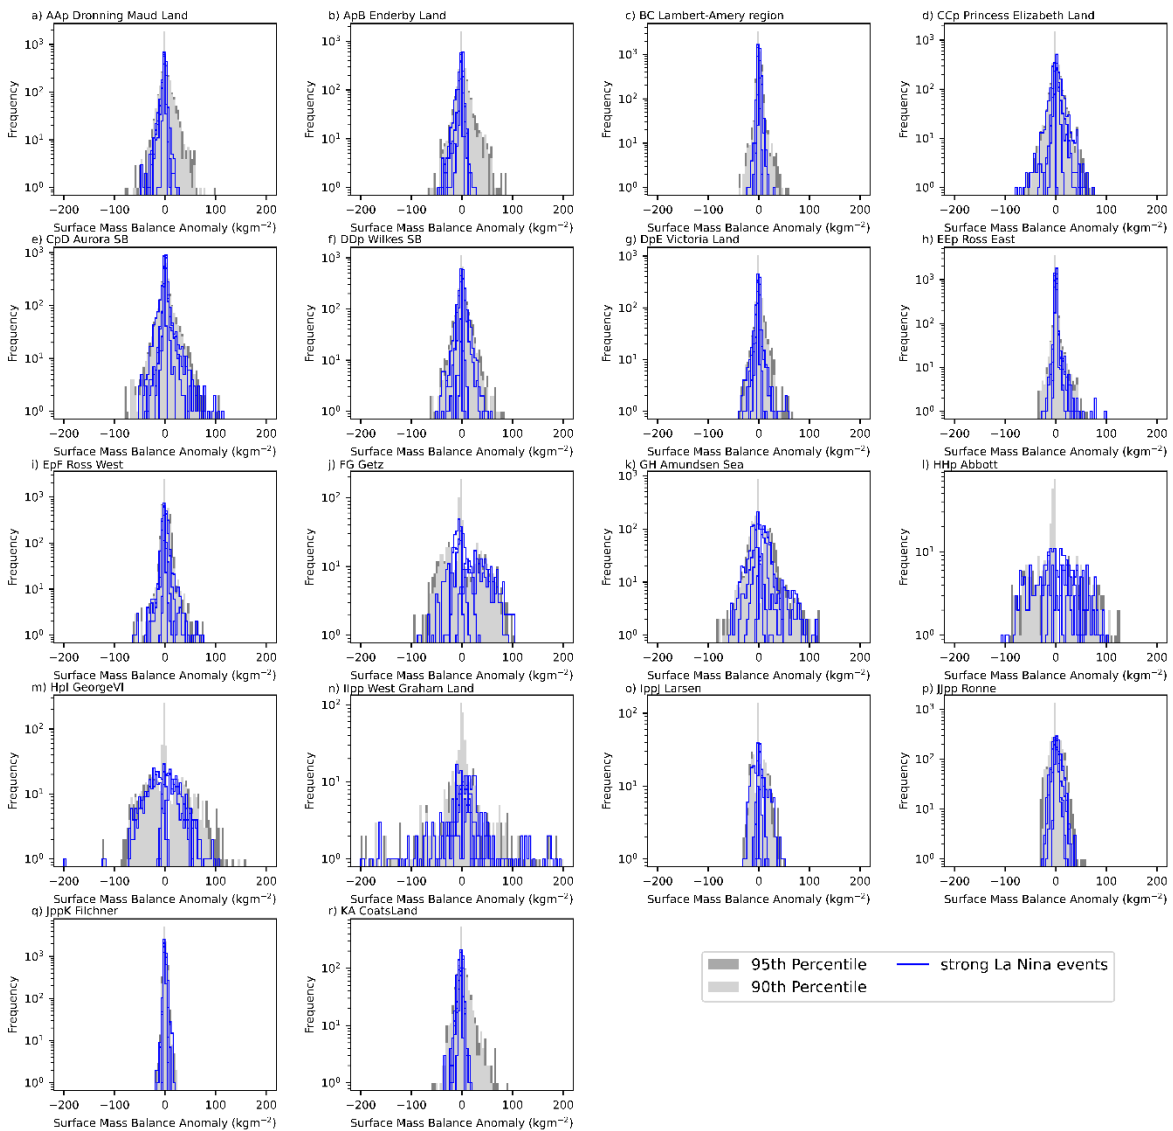

156

157 **Supplementary Figure S10.** Regional SMB probability distributions of SMB changes in  
 158 SON for strong La Niña events (blue lines), and regional 90th (light grey shading) and 95th  
 159 percentile (dark grey shading) SMB anomalies for SON for 1979-2018 period.

160

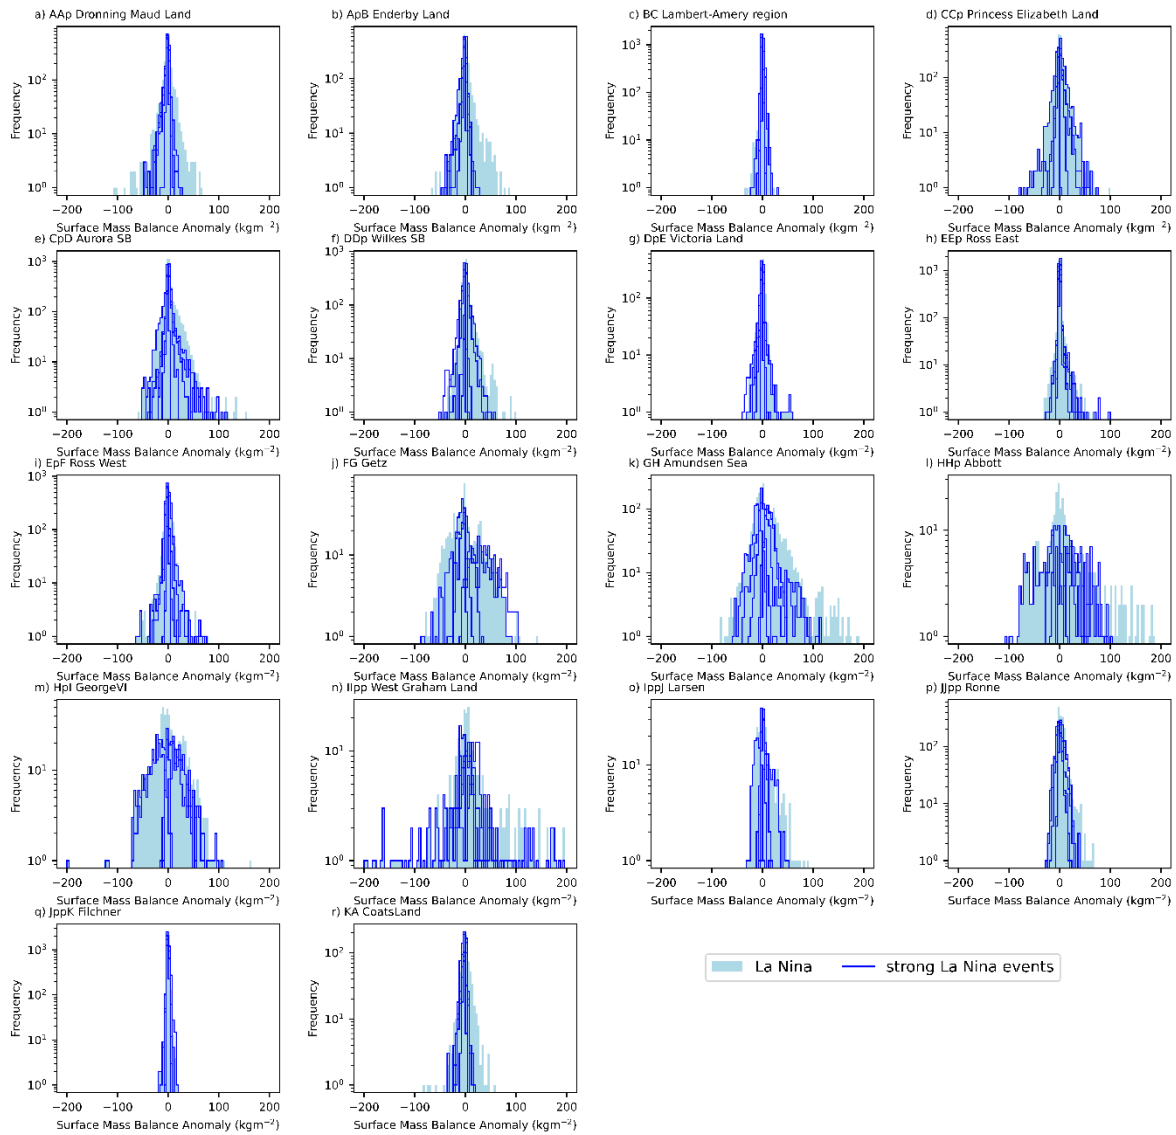

161  
162  
163  
164

**Supplementary Figure S11.** Regional SMB probability distributions of SMB changes in SON for La Niña events excluding strong events (light blue shading), during strong La Niña events (blue lines).

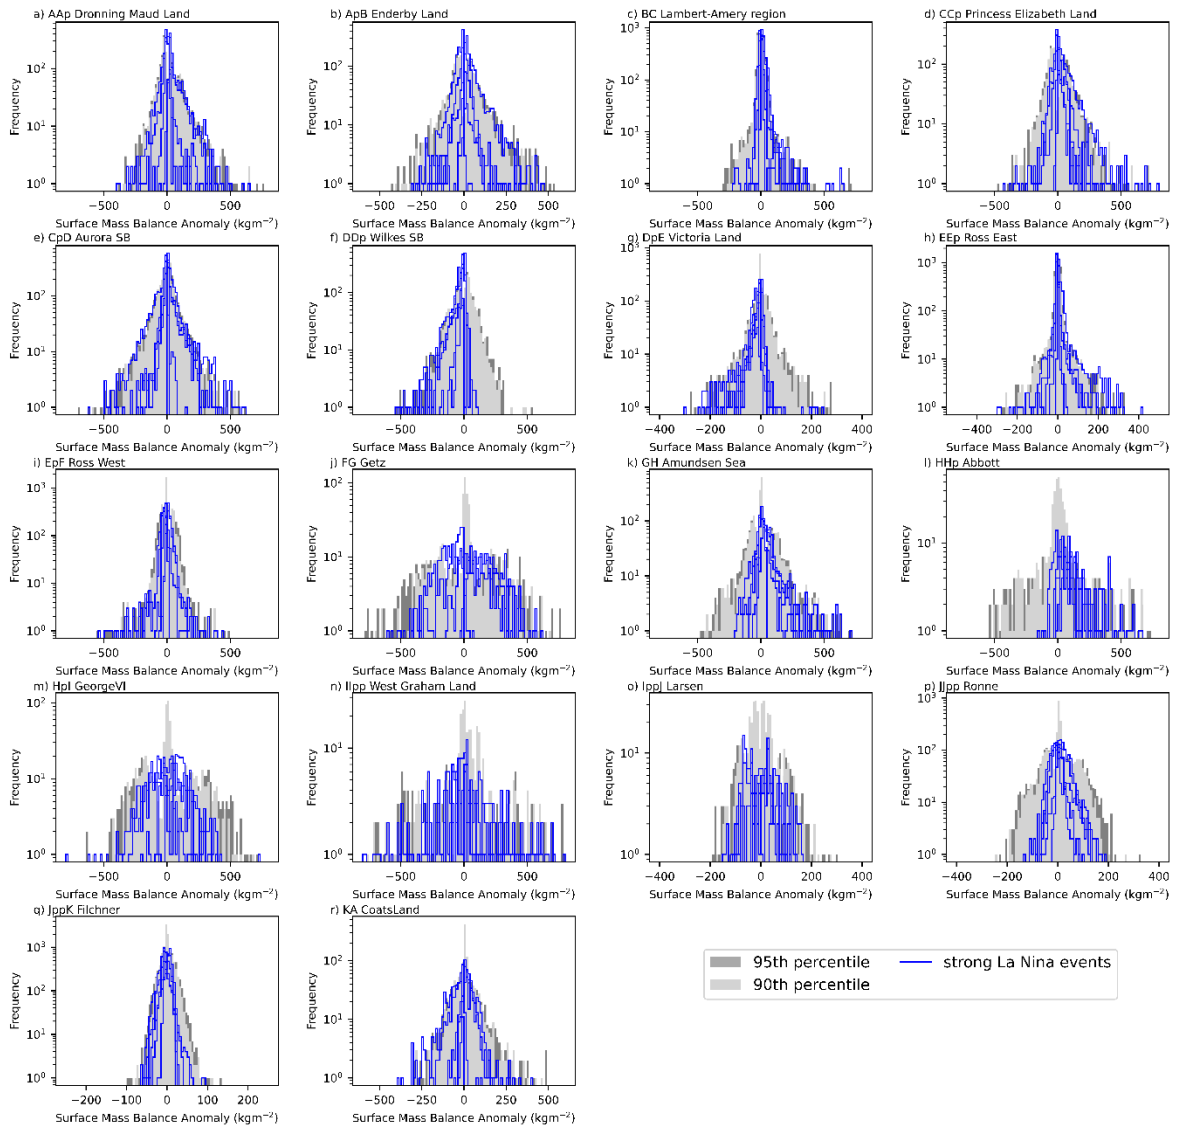

165

166 **Supplementary Figure S12.** Regional SMB probability distributions of cumulative annual  
 167 SMB anomalies (relative to 1979-2018 average) for strong La Niña events (blue lines) and  
 168 regional 90th (light grey shading) and 95th percentile (dark grey shading) SMB anomalies for  
 169 1979-2018 period.

170

171 **Section 5.2: Statistical significance testing of regional SMB anomalies distributions**  
 172 **during strong La Niña events.**  
 173

|      | Kolmogorov-Smirnov (K-S) test |                  |              |                  |              |                  |              |                  |              |                  |
|------|-------------------------------|------------------|--------------|------------------|--------------|------------------|--------------|------------------|--------------|------------------|
|      | 1988/89                       |                  | 1998/99      |                  | 1999/00      |                  | 2007/08      |                  | 2010/11      |                  |
|      | statistic                     | p-value          | statistic    | p-value          | statistic    | p-value          | statistic    | p-value          | statistic    | p-value          |
| AAp  | <b>0.266</b>                  | <b>&lt;0.001</b> | <b>0.231</b> | <b>&lt;0.001</b> | <b>0.181</b> | <b>&lt;0.001</b> | <b>0.227</b> | <b>&lt;0.001</b> | <b>0.257</b> | <b>&lt;0.001</b> |
| ApB  | <b>0.413</b>                  | <b>&lt;0.001</b> | <b>0.233</b> | <b>&lt;0.001</b> | <b>0.629</b> | <b>&lt;0.001</b> | <b>0.495</b> | <b>&lt;0.001</b> | <b>0.531</b> | <b>&lt;0.001</b> |
| BC   | <b>0.218</b>                  | <b>&lt;0.001</b> | <b>0.320</b> | <b>&lt;0.001</b> | <b>0.390</b> | <b>&lt;0.001</b> | <b>0.226</b> | <b>&lt;0.001</b> | <b>0.598</b> | <b>&lt;0.001</b> |
| CCp  | <b>0.527</b>                  | <b>&lt;0.001</b> | <b>0.208</b> | <b>&lt;0.001</b> | <b>0.544</b> | <b>&lt;0.001</b> | <b>0.300</b> | <b>&lt;0.001</b> | <b>0.346</b> | <b>&lt;0.001</b> |
| CpD  | <b>0.236</b>                  | <b>&lt;0.001</b> | <b>0.290</b> | <b>&lt;0.001</b> | <b>0.563</b> | <b>&lt;0.001</b> | <b>0.292</b> | <b>&lt;0.001</b> | <b>0.208</b> | <b>&lt;0.001</b> |
| DDp  | <b>0.409</b>                  | <b>&lt;0.001</b> | <b>0.485</b> | <b>&lt;0.001</b> | <b>0.352</b> | <b>&lt;0.001</b> | <b>0.538</b> | <b>&lt;0.001</b> | <b>0.176</b> | <b>&lt;0.001</b> |
| DpE  | <b>0.566</b>                  | <b>&lt;0.001</b> | <b>0.511</b> | <b>&lt;0.001</b> | <b>0.388</b> | <b>&lt;0.001</b> | <b>0.172</b> | <b>&lt;0.001</b> | <b>0.498</b> | <b>&lt;0.001</b> |
| EEp  | <b>0.434</b>                  | <b>&lt;0.001</b> | <b>0.505</b> | <b>&lt;0.001</b> | <b>0.454</b> | <b>&lt;0.001</b> | <b>0.276</b> | <b>&lt;0.001</b> | <b>0.171</b> | <b>&lt;0.001</b> |
| EpF  | <b>0.364</b>                  | <b>&lt;0.001</b> | <b>0.346</b> | <b>&lt;0.001</b> | <b>0.221</b> | <b>&lt;0.001</b> | <b>0.399</b> | <b>&lt;0.001</b> | <b>0.203</b> | <b>&lt;0.001</b> |
| FG   | <b>0.342</b>                  | <b>&lt;0.001</b> | <b>0.625</b> | <b>&lt;0.001</b> | <b>0.234</b> | <b>&lt;0.001</b> | <b>0.601</b> | <b>&lt;0.001</b> | <b>0.510</b> | <b>&lt;0.001</b> |
| GH   | <b>0.368</b>                  | <b>&lt;0.001</b> | <b>0.767</b> | <b>&lt;0.001</b> | 0.056        | 0.085            | <b>0.580</b> | <b>&lt;0.001</b> | <b>0.101</b> | <b>&lt;0.001</b> |
| HHp  | <b>0.508</b>                  | <b>&lt;0.001</b> | <b>0.714</b> | <b>&lt;0.001</b> | <b>0.212</b> | <b>&lt;0.001</b> | <b>0.552</b> | <b>&lt;0.001</b> | <b>0.281</b> | <b>&lt;0.001</b> |
| Hpl  | <b>0.404</b>                  | <b>&lt;0.001</b> | <b>0.595</b> | <b>&lt;0.001</b> | <b>0.624</b> | <b>&lt;0.001</b> | <b>0.224</b> | <b>&lt;0.001</b> | <b>0.482</b> | <b>&lt;0.001</b> |
| Ilpp | <b>0.478</b>                  | <b>&lt;0.001</b> | <b>0.272</b> | <b>&lt;0.001</b> | <b>0.192</b> | <b>&lt;0.001</b> | <b>0.484</b> | <b>&lt;0.001</b> | <b>0.411</b> | <b>&lt;0.001</b> |
| IppJ | <b>0.341</b>                  | <b>&lt;0.001</b> | <b>0.478</b> | <b>&lt;0.001</b> | <b>0.449</b> | <b>&lt;0.001</b> | <b>0.749</b> | <b>&lt;0.001</b> | <b>0.651</b> | <b>&lt;0.001</b> |
| JJpp | <b>0.200</b>                  | <b>&lt;0.001</b> | <b>0.535</b> | <b>&lt;0.001</b> | <b>0.314</b> | <b>&lt;0.001</b> | <b>0.191</b> | <b>&lt;0.001</b> | <b>0.643</b> | <b>&lt;0.001</b> |
| JppK | <b>0.423</b>                  | <b>&lt;0.001</b> | <b>0.042</b> | <b>&lt;0.001</b> | <b>0.174</b> | <b>&lt;0.001</b> | <b>0.280</b> | <b>&lt;0.001</b> | <b>0.454</b> | <b>&lt;0.001</b> |
| K    | <b>0.176</b>                  | <b>&lt;0.001</b> | <b>0.209</b> | <b>&lt;0.001</b> | <b>0.360</b> | <b>&lt;0.001</b> | <b>0.197</b> | <b>&lt;0.001</b> | <b>0.313</b> | <b>&lt;0.001</b> |

174 **Supplementary Table S3.** Kolmogorov-Smirnov test statistics and *p-value* results showing  
 175 statistically significant difference in SMB SON distributions for strong La Niña events  
 176 (1988/89, 1998/99, 1999/00, 2007/08, 2010/11) for each Antarctic region compared to the  
 177 SMB SON distribution for the region for the full 1979-2018 time period with Monte Carlo  
 178 Sampling and 1000 simulations. Results in **bold** are statistically significant at the 5%  
 179 significance level.  
 180

|     |         | Kolmogorov-Smirnov (K-S) test |                  |              |                  |              |                  |              |                  |
|-----|---------|-------------------------------|------------------|--------------|------------------|--------------|------------------|--------------|------------------|
|     |         | 1998/99                       |                  | 1999/00      |                  | 2007/08      |                  | 2010/11      |                  |
|     |         | statistic                     | p-value          | statistic    | p-value          | statistic    | p-value          | statistic    | p-value          |
| AAp | 1988/89 | <b>0.191</b>                  | <b>&lt;0.001</b> | <b>0.233</b> | <b>&lt;0.001</b> | <b>0.238</b> | <b>&lt;0.001</b> | <b>0.320</b> | <b>&lt;0.001</b> |
|     | 1998/99 | 0.000                         | 1.000            | <b>0.388</b> | <b>&lt;0.001</b> | <b>0.245</b> | <b>&lt;0.001</b> | <b>0.452</b> | <b>&lt;0.001</b> |
|     | 1999/00 |                               |                  | 0.000        | 1.000            | <b>0.195</b> | <b>&lt;0.001</b> | <b>0.166</b> | <b>&lt;0.001</b> |
|     | 2007/08 |                               |                  |              |                  | 0.000        | 1.000            | <b>0.288</b> | <b>&lt;0.001</b> |
| ApB | 1988/89 | <b>0.645</b>                  | <b>&lt;0.001</b> | <b>0.900</b> | <b>&lt;0.001</b> | <b>0.893</b> | <b>&lt;0.001</b> | <b>0.473</b> | <b>&lt;0.001</b> |
|     | 1998/99 | 0.000                         | 1.000            | 0.593        | <0.001           | <b>0.347</b> | <b>&lt;0.001</b> | <b>0.728</b> | <b>&lt;0.001</b> |
|     | 1999/00 |                               |                  | 0.000        | 1.000            | <b>0.477</b> | <b>&lt;0.001</b> | <b>0.928</b> | <b>&lt;0.001</b> |
|     | 2007/08 |                               |                  |              |                  | 0.000        | 1.000            | <b>0.960</b> | <b>&lt;0.001</b> |
| BC  | 1988/89 | <b>0.528</b>                  | <b>&lt;0.001</b> | <b>0.334</b> | <b>&lt;0.001</b> | <b>0.108</b> | <b>&lt;0.001</b> | <b>0.797</b> | <b>&lt;0.001</b> |
|     | 1998/99 | 0.000                         | 1.000            | 0.661        | 0.103            | <b>0.525</b> | <b>&lt;0.001</b> | <b>0.389</b> | <b>&lt;0.001</b> |
|     | 1999/00 |                               |                  | 0.000        | 1.000            | <b>0.286</b> | <b>&lt;0.001</b> | <b>0.883</b> | <b>&lt;0.001</b> |
|     | 2007/08 |                               |                  |              |                  | 0.000        | 1.000            | <b>0.823</b> | <b>&lt;0.001</b> |
| CCp | 1988/89 | <b>0.727</b>                  | <b>&lt;0.001</b> | <b>0.182</b> | <b>&lt;0.001</b> | <b>0.713</b> | <b>&lt;0.001</b> | <b>0.870</b> | <b>&lt;0.001</b> |
|     | 1998/99 | 0.000                         | 1.000            | <b>0.749</b> | <b>&lt;0.001</b> | <b>0.236</b> | <b>&lt;0.001</b> | <b>0.202</b> | <b>&lt;0.001</b> |
|     | 1999/00 |                               |                  | 0.000        | 1.000            | <b>0.829</b> | <b>&lt;0.001</b> | <b>0.880</b> | <b>&lt;0.001</b> |
|     | 2007/08 |                               |                  |              |                  | 0.000        | 1.000            | <b>0.219</b> | <b>&lt;0.001</b> |
| CpD | 1988/89 | <b>0.404</b>                  | <b>&lt;0.001</b> | <b>0.633</b> | <b>&lt;0.001</b> | <b>0.328</b> | <b>&lt;0.001</b> | <b>0.361</b> | <b>&lt;0.001</b> |
|     | 1998/99 | 0.000                         | 1.000            | <b>0.812</b> | <b>&lt;0.001</b> | <b>0.132</b> | <b>&lt;0.001</b> | <b>0.175</b> | <b>&lt;0.001</b> |
|     | 1999/00 |                               |                  | 0.000        | 1.000            | <b>0.853</b> | <b>&lt;0.001</b> | <b>0.700</b> | <b>&lt;0.001</b> |
|     | 2007/08 |                               |                  |              |                  | 0.000        | 1.000            | <b>0.163</b> | <b>&lt;0.001</b> |
| DDp | 1988/89 | <b>0.868</b>                  | <b>&lt;0.001</b> | <b>0.178</b> | <b>&lt;0.001</b> | <b>0.923</b> | <b>&lt;0.001</b> | <b>0.277</b> | <b>&lt;0.001</b> |
|     | 1998/99 | 0.000                         | 1.000            | <b>0.834</b> | <b>&lt;0.001</b> | <b>0.138</b> | <b>&lt;0.001</b> | <b>0.603</b> | <b>&lt;0.001</b> |
|     | 1999/00 |                               |                  | 0.000        | 1.000            | <b>0.873</b> | <b>&lt;0.001</b> | <b>0.245</b> | <b>&lt;0.001</b> |
|     | 2007/08 |                               |                  |              |                  | 0.000        | 1.000            | <b>0.664</b> | <b>&lt;0.001</b> |
| DpE | 1988/89 | <b>0.953</b>                  | <b>&lt;0.001</b> | <b>0.821</b> | <b>&lt;0.001</b> | <b>0.703</b> | <b>&lt;0.001</b> | <b>0.445</b> | <b>&lt;0.001</b> |
|     | 1998/99 | 0.000                         | 1.000            | <b>0.399</b> | <b>&lt;0.001</b> | <b>0.678</b> | <b>&lt;0.001</b> | <b>0.794</b> | <b>&lt;0.001</b> |
|     | 1999/00 |                               |                  | 0.000        | 1.000            | <b>0.548</b> | <b>&lt;0.001</b> | <b>0.659</b> | <b>&lt;0.001</b> |
|     | 2007/08 |                               |                  |              |                  | 0.000        | 1.000            | <b>0.617</b> | <b>&lt;0.001</b> |
| EEp | 1988/89 | <b>0.289</b>                  | <b>&lt;0.001</b> | <b>0.842</b> | <b>&lt;0.001</b> | <b>0.700</b> | <b>&lt;0.001</b> | <b>0.488</b> | <b>&lt;0.001</b> |
|     | 1998/99 | 0.000                         | 1.000            | <b>0.854</b> | <b>&lt;0.001</b> | <b>0.728</b> | <b>&lt;0.001</b> | <b>0.488</b> | <b>&lt;0.001</b> |
|     | 1999/00 |                               |                  | 0.000        | 1.000            | <b>0.423</b> | <b>&lt;0.001</b> | <b>0.388</b> | <b>&lt;0.001</b> |
|     | 2007/08 |                               |                  |              |                  | 0.000        | 1.000            | <b>0.290</b> | <b>&lt;0.001</b> |
| EpF | 1988/89 | <b>0.176</b>                  | <b>&lt;0.001</b> | <b>0.329</b> | <b>&lt;0.001</b> | <b>0.759</b> | <b>&lt;0.001</b> | <b>0.555</b> | <b>&lt;0.001</b> |
|     | 1998/99 | 0.000                         | 1.000            | <b>0.330</b> | <b>&lt;0.001</b> | <b>0.696</b> | <b>&lt;0.001</b> | <b>0.454</b> | <b>&lt;0.001</b> |
|     | 1999/00 |                               |                  | 0.000        | 1.000            | <b>0.568</b> | <b>&lt;0.001</b> | <b>0.298</b> | <b>&lt;0.001</b> |
|     | 2007/08 |                               |                  |              |                  | 0.000        | 1.000            | <b>0.419</b> | <b>&lt;0.001</b> |

181  
182  
183  
184  
185  
186  
187

**Supplementary Table S4.** (continued on next page). Kolmogorov-Smirnov test statistics and p-value results showing statistically significant difference between SMB SON distributions between each strong La Niña events (1988/89, 1998/99, 1999/00, 2007/08, 2010/11) for each Antarctic region, with Monte Carlo Sampling and 1000 simulations. Results in **bold** are statistically significant at the 5% significance level.

|      |         | Kolmogorov-Smirnov (K-S) test |                  |              |                  |              |                  |              |                  |
|------|---------|-------------------------------|------------------|--------------|------------------|--------------|------------------|--------------|------------------|
|      |         | 1998/99                       |                  | 1999/00      |                  | 2007/08      |                  | 2010/11      |                  |
|      |         | statistic                     | <i>p-value</i>   | statistic    | <i>p-value</i>   | statistic    | <i>p-value</i>   | statistic    | <i>p-value</i>   |
| FG   | 1988/89 | <b>0.943</b>                  | <b>&lt;0.001</b> | <b>0.494</b> | <b>&lt;0.001</b> | <b>0.813</b> | <b>&lt;0.001</b> | <b>0.841</b> | <b>&lt;0.001</b> |
|      | 1998/99 | 0.000                         | 1.000            | <b>0.761</b> | <b>&lt;0.001</b> | <b>0.972</b> | <b>&lt;0.001</b> | <b>0.159</b> | <b>&lt;0.001</b> |
|      | 1999/00 |                               |                  | 0.000        | 1.000            | <b>0.778</b> | <b>&lt;0.001</b> | <b>0.665</b> | <b>&lt;0.001</b> |
|      | 2007/08 |                               |                  |              |                  | 0.000        | 1.000            | <b>0.949</b> | <b>&lt;0.001</b> |
| GH   | 1988/89 | <b>0.937</b>                  | <b>&lt;0.001</b> | <b>0.339</b> | <b>&lt;0.001</b> | <b>0.930</b> | <b>&lt;0.001</b> | <b>0.355</b> | <b>&lt;0.001</b> |
|      | 1998/99 | 0.000                         | 1.000            | <b>0.792</b> | <b>&lt;0.001</b> | <b>0.820</b> | <b>&lt;0.001</b> | <b>0.741</b> | <b>&lt;0.001</b> |
|      | 1999/00 |                               |                  | 0.000        | 1.000            | <b>0.594</b> | <b>&lt;0.001</b> | <b>0.115</b> | <b>&lt;0.001</b> |
|      | 2007/08 |                               |                  |              |                  | 0.000        | 1.000            | <b>0.600</b> | <b>&lt;0.001</b> |
| HHp  | 1988/89 | <b>0.798</b>                  | <b>&lt;0.001</b> | <b>0.488</b> | <b>&lt;0.001</b> | <b>0.964</b> | <b>&lt;0.001</b> | <b>0.774</b> | <b>&lt;0.001</b> |
|      | 1998/99 | 0.000                         | 1.000            | <b>0.917</b> | <b>&lt;0.001</b> | <b>0.832</b> | <b>&lt;0.001</b> | <b>0.940</b> | <b>&lt;0.001</b> |
|      | 1999/00 |                               |                  | 0.000        | 1.000            | <b>0.726</b> | <b>&lt;0.001</b> | <b>0.369</b> | <b>&lt;0.001</b> |
|      | 2007/08 |                               |                  |              |                  | 0.000        | 1.000            | <b>0.417</b> | <b>&lt;0.001</b> |
| Hpl  | 1988/89 | <b>0.556</b>                  | <b>&lt;0.001</b> | <b>0.631</b> | <b>&lt;0.001</b> | <b>0.299</b> | <b>&lt;0.001</b> | <b>0.856</b> | <b>&lt;0.001</b> |
|      | 1998/99 | 0.000                         | 1.000            | <b>0.096</b> | <b>&lt;0.001</b> | <b>0.679</b> | <b>&lt;0.001</b> | <b>0.963</b> | <b>&lt;0.001</b> |
|      | 1999/00 |                               |                  | 0.000        | 1.000            | <b>0.733</b> | <b>&lt;0.001</b> | <b>0.947</b> | <b>&lt;0.001</b> |
|      | 2007/08 |                               |                  |              |                  | 0.000        | 1.000            | <b>0.695</b> | <b>&lt;0.001</b> |
| Ilpp | 1988/89 | <b>0.323</b>                  | <b>&lt;0.001</b> | <b>0.583</b> | <b>&lt;0.001</b> | <b>0.271</b> | <b>&lt;0.001</b> | <b>0.792</b> | <b>&lt;0.001</b> |
|      | 1998/99 | 0.000                         | 1.000            | 0.333        | 0.061            | 0.323        | 0.052            | 0.594        | 0.084            |
|      | 1999/00 |                               |                  | 0.000        | 1.000            | <b>0.583</b> | <b>&lt;0.001</b> | <b>0.344</b> | <b>&lt;0.001</b> |
|      | 2007/08 |                               |                  |              |                  | 0.000        | 1.000            | <b>0.781</b> | <b>&lt;0.001</b> |
| lppJ | 1988/89 | <b>0.778</b>                  | <b>&lt;0.001</b> | 0.741        | 0.709            | <b>0.988</b> | <b>&lt;0.001</b> | <b>0.951</b> | <b>&lt;0.001</b> |
|      | 1998/99 | 0.000                         | 1.000            | <b>0.074</b> | <b>&lt;0.001</b> | 0.975        | 0.744            | <b>0.296</b> | <b>&lt;0.001</b> |
|      | 1999/00 |                               |                  | 0.000        | 1.000            | <b>0.951</b> | <b>&lt;0.001</b> | <b>0.346</b> | <b>&lt;0.001</b> |
|      | 2007/08 |                               |                  |              |                  | 0.000        | 1.000            | <b>0.988</b> | <b>&lt;0.001</b> |
| JJpp | 1988/89 | <b>0.685</b>                  | <b>&lt;0.001</b> | <b>0.502</b> | <b>&lt;0.001</b> | <b>0.153</b> | <b>&lt;0.001</b> | <b>0.838</b> | <b>&lt;0.001</b> |
|      | 1998/99 | 0.000                         | 1.000            | <b>0.750</b> | <b>&lt;0.001</b> | <b>0.579</b> | <b>&lt;0.001</b> | <b>0.929</b> | <b>&lt;0.001</b> |
|      | 1999/00 |                               |                  | 0.000        | 1.000            | <b>0.454</b> | <b>&lt;0.001</b> | <b>0.721</b> | <b>&lt;0.001</b> |
|      | 2007/08 |                               |                  |              |                  | 0.000        | 1.000            | <b>0.833</b> | <b>&lt;0.001</b> |
| JppK | 1988/89 | <b>0.397</b>                  | <b>&lt;0.001</b> | <b>0.591</b> | <b>&lt;0.001</b> | <b>0.685</b> | <b>&lt;0.001</b> | <b>0.178</b> | <b>&lt;0.001</b> |
|      | 1998/99 | 0.000                         | 1.000            | <b>0.199</b> | <b>&lt;0.001</b> | <b>0.304</b> | <b>&lt;0.001</b> | <b>0.434</b> | <b>&lt;0.001</b> |
|      | 1999/00 |                               |                  | 0.000        | 1.000            | <b>0.140</b> | <b>&lt;0.001</b> | <b>0.595</b> | <b>&lt;0.001</b> |
|      | 2007/08 |                               |                  |              |                  | 0.000        | 1.000            | <b>0.721</b> | <b>&lt;0.001</b> |
| K    | 1988/89 | <b>0.228</b>                  | <b>&lt;0.001</b> | <b>0.513</b> | <b>&lt;0.001</b> | <b>0.356</b> | <b>&lt;0.001</b> | <b>0.185</b> | <b>&lt;0.001</b> |
|      | 1998/99 | 0.000                         | 1.000            | <b>0.379</b> | <b>&lt;0.001</b> | 0.236        | 0.106            | <b>0.379</b> | <b>&lt;0.001</b> |
|      | 1999/00 |                               |                  | 0.000        | 1.000            | <b>0.202</b> | <b>&lt;0.001</b> | <b>0.598</b> | <b>&lt;0.001</b> |
|      | 2007/08 |                               |                  |              |                  | 0.000        | 1.000            | <b>0.459</b> | <b>&lt;0.001</b> |

188  
189
